# Supplementary material for: Identification and Verification of Potential Therapeutic Target Genes in Berberine-Treated Zucker Diabetic Fatty Rats through Bioinformatics Analysis
Source: PLoS One. 2016 Nov 15;11(11):e0166378. doi: 10.1371/journal.pone.0166378 (PMC5112949; doi:10.1371/journal.pone.0166378)
Supplement: S3 Table — (XLSX) [file pone.0166378.s003.xlsx]

## Sheet: log(ConvsDM,2)>1log(BBvsDM,2)>1
# Fold Change cut-off: 1.0 # P-value cut-off: 0.05 # Condition pairs: log(ConvsDM,2)>1,log(BBRvsDM,2)>1 # Column A: ProbeName it represents probe name. # Column B~D Group--averaged Raw Intensity(mean) # Column E~F Condition pairs # Column G P-value, P-value calculated from unpaired t-test. # Column H ~ U: Annotations, include GeneSymbol,GeneName,GO,Description,KEGG,PrimaryAccession,RefSeqAccessio…
	Group--Raw Intensity(mean)			Condition pairs			Annotations														Raw Intensity									Normalized Intensity
ProbeName	group Con(mean)	group DM(mean)	groupBBR(mean)	log(ConvsDM,2)	log(BBRvsDM,2)	pvalue(ANOVA)	GeneSymbol	GeneName	GO	Description	KEGG	PrimaryAccession	RefSeqAccession	GenbankAccession	UniGeneID	EntrezGeneID	EnsemblID	TIGRID	GenomicCoordinates	Cytoband	groupCon/G1G2	groupCon/G3G4	groupCon/G5G6	group DM/G7G8	group DM/G11G44	group DM/G9G10	groupBer/G41G42	groupBer/G37G38	groupBer/G39G40	groupCon/G1G2_NormSignal	groupCon/G3G4_NormSignal	groupCon/G5G6_NormSignal	group DM/G7G8_NormSignal	group DM/G11G44_NormSignal	group DM/G9G10_NormSignal	groupBer/G41G42_NormSignal	groupBer/G37G38_NormSignal	groupBer/G39G40_NormSignal
A_44_P214811	34.1254	2.27517	4.93041	3.9068	1.11574	3.04878e-05	Tfrc	transferrin receptor	GO:0001666(response to hypoxia)|GO:0004998(transferrin receptor activity)|GO:0005576(extracellular region)|GO:0005739(mitochondrion)|GO:0005768(endosome)|GO:0005886(plasma membrane)|GO:0005905(coated pit)|GO:0006508(proteolysis)|GO:0006879(cellular iron ion homeostasis)|GO:0006953(acute-phase response)|GO:0007568(aging)|GO:0007584(response to nutrient)|GO:0008233(peptidase activity)|GO:0009897(ex…	Rattus norvegicus transferrin receptor (Tfrc), mRNA [NM_022712]	04144:Endocytosis|04145:Phagosome|04640:Hematopoietic cell lineage	NM_022712	NM_022712	NM_022712	Rn.98672	64678	ENSRNOT00000002407	TC588361	chr11:69976687-69976628	rn|11q22	26.5871	37.8946	37.8946	2.16607	2.69535	1.96408	5.60438	3.18855	5.9983	4.73265	5.24392	5.24392	1.11508	1.43047	0.973851	2.48655	1.6729	2.58455
A_44_P780805	2.46284	1.06513	3.47168	1.20929	1.7046	0.000260924	Ino80c	INO80 complex subunit C	GO:0003674(molecular_function)|GO:0005575(cellular_component)|GO:0005730(nucleolus)|GO:0006281(DNA repair)|GO:0006310(DNA recombination)|GO:0006351(transcription, DNA-dependent)|GO:0006355(regulation of transcription, DNA-dependent)|GO:0008150(biological_process)|GO:0031011(Ino80 complex)|GO:0071339(MLL1 complex)	Rattus norvegicus INO80 complex subunit C (Ino80c), mRNA [NM_001017446]		NM_001017446	NM_001017446	NM_001017446	Rn.18319	291737	ENSRNOT00000022169	TC582191	chr18:15864542-15864483	rn|18p12	2.92951	2.2295	2.2295	1.18149	1.00696	1.00696	2.9199	3.18855	4.30659	1.55066	1.15672	1.15672	0.240607	0.01	0.01	1.54592	1.6729	2.10655
A_64_P087871	4.37203	1.00696	2.74354	2.1183	1.44604	0.000375484	Cpeb1	cytoplasmic polyadenylation element binding protein 1	GO:0000166(nucleotide binding)|GO:0000932(cytoplasmic mRNA processing body)|GO:0003676(nucleic acid binding)|GO:0003723(RNA binding)|GO:0003729(mRNA binding)|GO:0005886(plasma membrane)|GO:0006397(mRNA processing)|GO:0006417(regulation of translation)|GO:0007130(synaptonemal complex assembly)|GO:0014069(postsynaptic density)|GO:0016020(membrane)|GO:0030054(cell junction)|GO:0045211(postsynaptic m…	Rattus norvegicus cytoplasmic polyadenylation element binding protein 1 (Cpeb1), mRNA [NM_001106276]	04114:Oocyte meiosis|04320:Dorso-ventral axis formation|04914:Progesterone-mediated oocyte maturation	NM_001106276	NM_001106276	NM_001106276	Rn.224485	293056	ENSRNOT00000026009	TC647626	chr1:137559100-137559041	rn|1q31	2.92951	5.09329	5.09329	1.00696	1.00696	1.00696	2.34673	3.18855	2.69535	1.55066	2.3486	2.3486	0.01	0.01	0.01	1.23065	1.6729	1.43047
A_64_P021671	63.4689	13.7078	32.4778	2.21106	1.24446	0.000563033	Wdr92	WD repeat domain 92	GO:0034968(histone lysine methylation)|GO:0035064(methylated histone residue binding)	Rattus norvegicus WD repeat domain 92 (Wdr92), mRNA [NM_001127559]		NM_001127559	NM_001127559	NM_001127559	Rn.25205	498418	ENSRNOT00000029980	TC582611	chr14:98132406-98132465	rn|14q22	78.9941	55.7064	55.7064	16.7895	8.79617	15.5376	31.0498	33.8569	32.5266	6.30367	5.79977	5.79977	4.06949	3.13687	3.95769	4.95651	5.08138	5.02355
A_42_P770556	2.84375	1.06742	2.46021	1.41367	1.20466	0.000759752	Ppm1b	protein phosphatase, Mg2+/Mn2+ dependent, 1B	GO:0000287(magnesium ion binding)|GO:0004722(protein serine/threonine phosphatase activity)|GO:0006470(protein dephosphorylation)|GO:0030145(manganese ion binding)|GO:0035970(peptidyl-threonine dephosphorylation)	Rattus norvegicus protein phosphatase, Mg2+/Mn2+ dependent, 1B (Ppm1b), transcript variant 1, mRNA [NM_033096]	04010:MAPK signaling pathway	NM_033096	NM_033096	NM_033096	Rn.4143	24667		TC574496	chr6:8373425-8373484	rn|6q12	2.92951	2.80088	2.80088	1.18149	1.0138	1.00696	2.34673	3.18855	1.84536	1.55066	1.48588	1.48588	0.240607	0.0197766	0.01	1.23065	1.6729	0.883901
A_44_P389072	4.29012	1.0323	2.79739	2.05516	1.43822	0.00081166	Il13ra1	interleukin 13 receptor, alpha 1	GO:0002639(positive regulation of immunoglobulin production)|GO:0004896(cytokine receptor activity)|GO:0005575(cellular_component)|GO:0016515(interleukin-13 receptor activity)|GO:0030890(positive regulation of B cell proliferation)	Rattus norvegicus interleukin 13 receptor, alpha 1 (Il13ra1), mRNA [NM_145789]	04060:Cytokine-cytokine receptor interaction|04630:Jak-STAT signaling pathway	NM_145789	NM_145789	NM_145789	Rn.81210	252963	ENSRNOT00000017746	TC574209	chr11:73147821-73147762	rn|11q22	4.42078	4.2248	4.2248	1.00696	1.00696	1.08299	1.68496	3.18855	3.51865	2.1443	2.07888	2.07888	0.01	0.01	0.115015	0.752715	1.6729	1.81502
A_44_P254984	3.99111	1.00924	3.97415	1.98352	1.97738	0.000872945	Pnlip	pancreatic lipase	GO:0004806(triglyceride lipase activity)|GO:0005615(extracellular space)|GO:0006629(lipid metabolic process)|GO:0009791(post-embryonic development)|GO:0016042(lipid catabolic process)|GO:0016298(lipase activity)|GO:0030299(intestinal cholesterol absorption)|GO:0033993(response to lipid)|GO:0043434(response to peptide hormone stimulus)|GO:0046872(metal ion binding)|GO:0050253(retinyl-palmitate est…	Rattus norvegicus pancreatic lipase (Pnlip), mRNA [NM_013161]	00561:Glycerolipid metabolism|01100:Metabolic pathways|04972:Pancreatic secretion|04975:Fat digestion and absorption|04977:Vitamin digestion and absorption	NM_013161	NM_013161	NM_013161	Rn.10130	25702	ENSRNOT00000024065	TC578319	chr1:265114441-265116798	rn|1q55	3.52374	4.2248	4.2248	1.00696	1.0138	1.00696	6.03855	3.18855	2.69535	1.81711	2.07888	2.07888	0.01	0.0197766	0.01	2.5942	1.6729	1.43047
A_43_P20587	20.5131	8.71271	32.6188	1.23535	1.90451	0.000907318	Gypc	glycophorin C (Gerbich blood group)	GO:0005886(plasma membrane)|GO:0016020(membrane)|GO:0016021(integral to membrane)|GO:0030863(cortical cytoskeleton)	Rattus norvegicus glycophorin C (Gerbich blood group) (Gypc), mRNA [NM_001013233]	05144:Malaria	NM_001013233	NM_001013233	NM_001013233	Rn.7693	364837	ENSRNOT00000046369	TC576066	chr18:24975793-24975734	rn|18p12	15.0289	23.2552	23.2552	7.97116	7.04495	11.122	27.334	32.2542	38.2682	3.90967	4.53948	4.53948	2.99479	2.81659	3.47535	4.77262	5.01142	5.25807
A_64_P157899	3.61073	1.03458	3.01798	1.80324	1.54454	0.00118242	Ift52	intraflagellar transport 52 homolog (Chlamydomonas)	GO:0001841(neural tube formation)|GO:0001947(heart looping)|GO:0007224(smoothened signaling pathway)|GO:0007368(determination of left/right symmetry)|GO:0009953(dorsal/ventral pattern formation)|GO:0032391(photoreceptor connecting cilium)|GO:0042733(embryonic digit morphogenesis)|GO:0044292(dendrite terminus)|GO:0045862(positive regulation of proteolysis)	Rattus norvegicus intraflagellar transport 52 homolog (Chlamydomonas) (Ift52), mRNA [NM_001177685]		NM_001177685	NM_001177685	NM_001177685	Rn.36626	362265		TC646956	chr3:153917476-153917535	rn|3q42	2.38259	4.2248	4.2248	1.00696	1.0138	1.08299	2.34673	3.18855	3.51865	1.25253	2.07888	2.07888	0.01	0.0197766	0.115015	1.23065	1.6729	1.81502
A_44_P207963	2.41816	1.09048	2.9346	1.14895	1.42821	0.00154237	Afap1	actin filament associated protein 1	GO:0003779(actin binding)|GO:0005515(protein binding)|GO:0005543(phospholipid binding)|GO:0005737(cytoplasm)|GO:0005884(actin filament)|GO:0005925(focal adhesion)|GO:0007165(signal transduction)|GO:0009966(regulation of signal transduction)|GO:0015629(actin cytoskeleton)|GO:0017124(SH3 domain binding)|GO:0042169(SH2 domain binding)|GO:0071260(cellular response to mechanical stimulus)	Rattus norvegicus actin filament associated protein 1 (Afap1), mRNA [NM_080900]		NM_080900	NM_080900	NM_080900	Rn.208751	140935	ENSRNOT00000010346	TC574870	chr14:80358128-80358069	rn|14q21	1.65274	2.80088	2.80088	1.18149	1.00696	1.08299	2.9199	3.18855	2.69535	0.72486	1.48588	1.48588	0.240607	0.01	0.115015	1.54592	1.6729	1.43047
A_64_P103424	4.95394	1.00696	2.46021	2.29858	1.28878	0.00172396	Il11	interleukin 11	GO:0005125(cytokine activity)|GO:0005142(interleukin-11 receptor binding)|GO:0005615(extracellular space)|GO:0005737(cytoplasm)|GO:0008083(growth factor activity)|GO:0008284(positive regulation of cell proliferation)|GO:0033138(positive regulation of peptidyl-serine phosphorylation)|GO:0043410(positive regulation of MAPK cascade)|GO:0045944(positive regulation of transcription from RNA polymerase…	Rattus norvegicus interleukin 11 (Il11), mRNA [NM_133519]	04060:Cytokine-cytokine receptor interaction|04630:Jak-STAT signaling pathway|04640:Hematopoietic cell lineage|05323:Rheumatoid arthritis	NM_133519	NM_133519	NM_133519	Rn.198483	171040	ENSRNOT00000023489	TC579261	chr1:67788418-67788477	rn|1q12	2.92951	5.96616	5.96616	1.00696	1.00696	1.00696	2.34673	3.18855	1.84536	1.55066	2.5768	2.5768	0.01	0.01	0.01	1.23065	1.6729	0.883901
A_64_P215398	7.25962	1.38417	4.25569	2.39087	1.62037	0.00237287	Lyc2	lysozyme C type 2	GO:0003796(lysozyme activity)|GO:0005576(extracellular region)|GO:0016998(cell wall macromolecule catabolic process)|GO:0019835(cytolysis)|GO:0042742(defense response to bacterium)	Rattus norvegicus lysozyme C type 2 (Lyc2), mRNA [NM_001128494]		NM_001128494	NM_001128494	NM_001128494	Rn.162941	688047	ENSRNOT00000064594	TC589323	chr7:56591843-56591902	rn|7q22	4.42078	8.67903	8.67903	1.18149	1.00696	1.96408	4.5083	3.18855	5.07022	2.1443	3.11753	3.11753	0.240607	0.01	0.973851	2.17258	1.6729	2.34205
A_64_P023300	27.9788	9.90017	24.7298	1.49881	1.32072	0.00255328	Dot1l	DOT1-like, histone H3 methyltransferase (S. cerevisiae)	GO:0003674(molecular_function)|GO:0003677(DNA binding)|GO:0005575(cellular_component)|GO:0005634(nucleus)|GO:0008134(transcription factor binding)|GO:0008150(biological_process)|GO:0016571(histone methylation)|GO:0018024(histone-lysine N-methyltransferase activity)|GO:0034968(histone lysine methylation)|GO:0042054(histone methyltransferase activity)|GO:0046425(regulation of JAK-STAT cascade)|GO:2…	Rattus norvegicus DOT1-like, histone H3 methyltransferase (S. cerevisiae) (Dot1l), mRNA [NM_001108733]	00310:Lysine degradation	NM_001108733	NM_001108733	NM_001108733	Rn.228827	362831	ENSRNOT00000051467	TC613483	chr7:10433800-10433741	rn|7q11	33.7699	25.0833	25.0833	11.122	9.44647	9.13202	32.123	16.7895	25.2767	5.07766	4.64866	4.64866	3.47535	3.23977	3.19093	5.00554	4.06949	4.65974
A_44_P167965	2.46284	1.06513	2.46021	1.20929	1.20775	0.00260854	Gpr56	G protein-coupled receptor 56	GO:0004930(G-protein coupled receptor activity)|GO:0005886(plasma membrane)|GO:0007155(cell adhesion)|GO:0007218(neuropeptide signaling pathway)|GO:0007420(brain development)|GO:0016021(integral to membrane)	Rattus norvegicus G protein-coupled receptor 56 (Gpr56), mRNA [NM_152242]		NM_152242	NM_152242	NM_152242	Rn.1677	260326	ENSRNOT00000020921	TC574805	chr19:10440303-10440244	rn|19p13	2.92951	2.2295	2.2295	1.18149	1.00696	1.00696	2.34673	3.18855	1.84536	1.55066	1.15672	1.15672	0.240607	0.01	0.01	1.23065	1.6729	0.883901
A_64_P078448	25.1706	10.2219	37.1421	1.30007	1.86139	0.00347877	LOC100364862	hypothetical protein LOC100364862		PREDICTED: Rattus norvegicus hypothetical protein LOC100364862 (LOC100364862), mRNA [XM_002724640]		XM_002724640	XM_002724640	XM_002724640		100364862			chr10:88878192-88878251	rn|10q32.1	29.0014	23.2552	23.2552	7.97116	11.5725	11.122	31.0498	55.0997	25.2767	4.85805	4.53948	4.53948	2.99479	3.53263	3.47535	4.95651	5.78397	4.65974
A_64_P139063	63.573	7.83472	19.6483	3.02046	1.32645	0.00450748	LOC683788	similar to Fascin (Singed-like protein)	GO:0001725(stress fiber)|GO:0001726(ruffle)|GO:0001889(liver development)|GO:0003779(actin binding)|GO:0005515(protein binding)|GO:0005737(cytoplasm)|GO:0005829(cytosol)|GO:0005886(plasma membrane)|GO:0005902(microvillus)|GO:0030027(lamellipodium)|GO:0030054(cell junction)|GO:0030175(filopodium)|GO:0030425(dendrite)|GO:0030426(growth cone)|GO:0030674(protein binding, bridging)|GO:0048870(cell mot…	Rattus norvegicus similar to Fascin (Singed-like protein) (LOC683788), mRNA [NM_001100806]		NM_001100806	NM_001100806	NM_001100806	Rn.199526	683788		TC635565			67.8565	61.4313	61.4313	6.6437	9.44647	7.41398	9.05929	39.2036	10.6821	6.08442	5.9409	5.9409	2.73199	3.23977	2.89025	3.1794	5.29291	3.41713
A_44_P292503	7.25962	1.0323	3.62394	2.81403	1.8117	0.00464616	Atf6b	activating transcription factor 6 beta	GO:0005622(intracellular)|GO:0005634(nucleus)|GO:0005730(nucleolus)|GO:0005925(focal adhesion)	Rattus norvegicus activating transcription factor 6 beta (Atf6b), mRNA [NM_001002809]	04141:Protein processing in endoplasmic reticulum	NM_001002809	NM_001002809	NM_001002809	Rn.18179	406169	ENSRNOT00000000492	TC582979	chr20:4193558-4193369	rn|20p12	4.42078	8.67903	8.67903	1.00696	1.00696	1.08299	1.68496	3.18855	5.9983	2.1443	3.11753	3.11753	0.01	0.01	0.115015	0.752715	1.6729	2.58455
A_44_P146845	5.45103	1.0323	2.29695	2.40067	1.15386	0.00481569	Orm1	orosomucoid 1	GO:0002438(acute inflammatory response to antigenic stimulus)|GO:0002439(chronic inflammatory response to antigenic stimulus)|GO:0002682(regulation of immune system process)|GO:0005615(extracellular space)|GO:0006810(transport)|GO:0006953(acute-phase response)|GO:0008144(drug binding)|GO:0014070(response to organic cyclic compound)|GO:0031100(organ regeneration)|GO:0032496(response to lipopolysac…	Rattus norvegicus orosomucoid 1 (Orm1), mRNA [NM_053288]		NM_053288	NM_053288	NM_053288	Rn.10295	24614	ENSRNOT00000010454	TC581067	chr5:80326525-80326584	rn|5q24	4.42078	5.96616	5.96616	1.00696	1.00696	1.08299	1.00696	3.18855	2.69535	2.1443	2.5768	2.5768	0.01	0.01	0.115015	0.01	1.6729	1.43047
A_64_P157496	3.04183	1.29179	3.72623	1.23556	1.52834	0.00516099	Celf2	CUGBP, Elav-like family member 2	GO:0000166(nucleotide binding)|GO:0003723(RNA binding)|GO:0005634(nucleus)|GO:0005737(cytoplasm)|GO:0006376(mRNA splice site selection)	Rattus norvegicus CUGBP, Elav-like family member 2 (Celf2), transcript variant 2, mRNA [NM_001083586]		NM_001083586	NM_001083586	NM_001083586	Rn.162247	29428	ENSRNOT00000023436	TC587531	chr17:83022081-83022140	rn|17q12.3	3.52374	2.80088	2.80088	1.00696	1.78544	1.08299	2.9199	3.18855	5.07022	1.81711	1.48588	1.48588	0.01	0.836282	0.115015	1.54592	1.6729	2.34205
A_44_P579594	4.77163	1.03458	5.35041	2.20544	2.3706	0.0052311	Dse	dermatan sulfate epimerase	GO:0005783(endoplasmic reticulum)|GO:0005794(Golgi apparatus)|GO:0030208(dermatan sulfate biosynthetic process)|GO:0047757(chondroitin-glucuronate 5-epimerase activity)	Rattus norvegicus dermatan sulfate epimerase (Dse), mRNA [NM_001108933]	00532:Glycosaminoglycan biosynthesis - chondroitin sulfate	NM_001108933	NM_001108933	NM_001108933	Rn.100430	365583	ENSRNOT00000001093	TC589412	chr20:37647126-37647185	rn|20q11	2.38259	5.96616	5.96616	1.00696	1.0138	1.08299	5.09329	3.18855	7.76939	1.25253	2.5768	2.5768	0.01	0.0197766	0.115015	2.3486	1.6729	2.9578
A_64_P006633	2.66145	1.06742	2.79739	1.31809	1.38996	0.00530773	Olr563	olfactory receptor 563	GO:0004930(G-protein coupled receptor activity)|GO:0004984(olfactory receptor activity)|GO:0005886(plasma membrane)|GO:0007186(G-protein coupled receptor signaling pathway)|GO:0016021(integral to membrane)|GO:0050911(detection of chemical stimulus involved in sensory perception of smell)	Rattus norvegicus olfactory receptor 563 (Olr563), mRNA [NM_001000666]		NM_001000666	NM_001000666	NM_001000666	Rn.142901	404868	ENSRNOT00000057478	NP1479106	chr3:71097817-71097876	rn|3q24	2.38259	2.80088	2.80088	1.18149	1.0138	1.00696	1.68496	3.18855	3.51865	1.25253	1.48588	1.48588	0.240607	0.0197766	0.01	0.752715	1.6729	1.81502
A_64_P126355	3.36744	1.00696	3.40693	1.74165	1.75847	0.00549457	Crispld2	cysteine-rich secretory protein LCCL domain containing 2	GO:0005539(glycosaminoglycan binding)|GO:0005576(extracellular region)|GO:0008201(heparin binding)|GO:0030133(transport vesicle)|GO:0030198(extracellular matrix organization)|GO:0030324(lung development)|GO:0031012(extracellular matrix)	Rattus norvegicus cysteine-rich secretory protein LCCL domain containing 2 (Crispld2), mRNA [NM_138518]		NM_138518	NM_138518	NM_138518	Rn.4346	171547	ENSRNOT00000068389	TC580541	chr19:50376958-50377017	rn|19q12	1.65274	4.2248	4.2248	1.00696	1.00696	1.00696	3.51358	3.18855	3.51865	0.72486	2.07888	2.07888	0.01	0.01	0.01	1.81294	1.6729	1.81502
A_44_P421944	3.03485	1.0323	4.41794	1.55576	2.09751	0.00561665	LOC100910095	histone H3.3-like		PREDICTED: Rattus norvegicus histone H3.3-like (LOC100910095), mRNA [XM_003751688]		XM_003751688	XM_003751688	XM_003751688		100910095			chr17:42771288-42771347	rn|17p11	2.38259	3.36098	3.36098	1.00696	1.00696	1.08299	7.36992	3.18855	2.69535	1.25253	1.74888	1.74888	0.01	0.01	0.115015	2.88165	1.6729	1.43047
A_64_P100530	3.71425	1.326	3.01798	1.48599	1.18651	0.00608794	Arhgap12	Rho GTPase activating protein 12	GO:0005543(phospholipid binding)|GO:0005622(intracellular)|GO:0007165(signal transduction)	Rattus norvegicus Rho GTPase activating protein 12 (Arhgap12), mRNA [NM_001107357]		NM_001107357	NM_001107357	NM_001107357	Rn.34541	307016	ENSRNOT00000024022		chr17:59909860-59909919	rn|17q12.1	4.42078	3.36098	3.36098	1.00696	1.00696	1.96408	2.34673	3.18855	3.51865	2.1443	1.74888	1.74888	0.01	0.01	0.973851	1.23065	1.6729	1.81502
A_64_P091728	3.34084	1.32828	4.25569	1.33066	1.67984	0.00640398	Slc22a1	solute carrier family 22 (organic cation transporter), member 1	GO:0005277(acetylcholine transmembrane transporter activity)|GO:0005329(dopamine transmembrane transporter activity)|GO:0005333(norepinephrine transmembrane transporter activity)|GO:0005887(integral to plasma membrane)|GO:0006812(cation transport)|GO:0006855(drug transmembrane transport)|GO:0008504(monoamine transmembrane transporter activity)|GO:0008513(secondary active organic cation transmembr…	Rattus norvegicus solute carrier family 22 (organic cation transporter), member 1 (Slc22a1), mRNA [NM_012697]	04976:Bile secretion	NM_012697	NM_012697	NM_012697	Rn.11186	24904	ENSRNOT00000022254	TC576988	chr1:42378235-42378294	rn|1q11	4.42078	2.80088	2.80088	1.00696	1.0138	1.96408	4.5083	3.18855	5.07022	2.1443	1.48588	1.48588	0.01	0.0197766	0.973851	2.17258	1.6729	2.34205
A_44_P488918	33.4169	8.6203	48.3079	1.95477	2.48645	0.00697982	RGD1565591	similar to Ski protein		PREDICTED: Rattus norvegicus similar to Ski protein (RGD1565591), mRNA [XM_001077382]		XM_001077382	XM_001077382	XM_001077382	Rn.8311	313757		TC582886	chr5:171955116-171955057	rn|5q36	32.9034	33.6737	33.6737	8.51168	7.72593	9.62328	27.334	90.9566	26.6331	5.04016	5.07355	5.07355	3.08944	2.94971	3.26653	4.77262	6.50711	4.73515
A_44_P121351	26.3893	6.48194	17.1557	2.02546	1.40419	0.00708308	Drd2	dopamine receptor D2	GO:0001591(dopamine receptor activity, coupled via Gi/Go)|GO:0001659(temperature homeostasis)|GO:0001666(response to hypoxia)|GO:0001669(acrosomal vesicle)|GO:0001963(synaptic transmission, dopaminergic)|GO:0001964(startle response)|GO:0001975(response to amphetamine)|GO:0001976(neurological system process involved in regulation of systemic arterial blood pressure)|GO:0002027(regulation of heart …	Rattus norvegicus dopamine receptor D2 (Drd2), mRNA [NM_012547]	04080:Neuroactive ligand-receptor interaction|04540:Gap junction	NM_012547	NM_012547	NM_012547	Rn.87299	24318	ENSRNOT00000045944	TC642479	chr8:52706533-52706592	rn|8q23	29.0014	25.0833	25.0833	5.66716	6.36468	7.41398	10.0742	29.4323	11.9606	4.85805	4.64866	4.64866	2.50263	2.67009	2.89025	3.33259	4.87933	3.58022
A_44_P685613	5.99357	1.32463	3.60379	2.17783	1.44392	0.00723074	Zfp407	zinc finger protein 407	GO:0003676(nucleic acid binding)|GO:0005622(intracellular)|GO:0008270(zinc ion binding)	PREDICTED: Rattus norvegicus zinc finger protein 407 (Zfp407), mRNA [XM_225679]		XM_225679	XM_225679	XM_225679	Rn.28602	307213		TC625056	chr18:80747152-80747093	rn|18q12.3	2.92951	7.52561	7.52561	1.18149	1.78544	1.00696	4.10415	3.18855	3.51865	1.55066	2.91181	2.91181	0.240607	0.836282	0.01	2.03708	1.6729	1.81502
A_64_P018918	3.34084	1.26645	2.74354	1.39942	1.11525	0.00762833	Rps2	ribosomal protein S2	GO:0000028(ribosomal small subunit assembly)|GO:0001731(formation of translation preinitiation complex)|GO:0003723(RNA binding)|GO:0003735(structural constituent of ribosome)|GO:0005654(nucleoplasm)|GO:0005730(nucleolus)|GO:0017134(fibroblast growth factor binding)|GO:0022627(cytosolic small ribosomal subunit)|GO:0030529(ribonucleoprotein complex)|GO:0032403(protein complex binding)|GO:0071353(ce…	Rattus norvegicus ribosomal protein S2 (Rps2), mRNA [NM_031838]	03010:Ribosome	NM_031838	NM_031838	NM_031838	Rn.2115	83789	ENSRNOT00000002656	TC624667	chr10:13976628-13976688	rn|10q12	4.42078	2.80088	2.80088	1.00696	1.78544	1.00696	2.34673	3.18855	2.69535	2.1443	1.48588	1.48588	0.01	0.836282	0.01	1.23065	1.6729	1.43047
A_64_P010613	2.41816	1.09048	3.53517	1.14895	1.69682	0.00799311	Asf1a	ASF1 anti-silencing function 1 homolog A (S. cerevisiae)	GO:0001649(osteoblast differentiation)|GO:0005634(nucleus)|GO:0006281(DNA repair)|GO:0006334(nucleosome assembly)|GO:0016585(chromatin remodeling complex)|GO:0042393(histone binding)|GO:0042692(muscle cell differentiation)	Rattus norvegicus ASF1 anti-silencing function 1 homolog A (S. cerevisiae) (Asf1a), mRNA [NM_001106389]		NM_001106389	NM_001106389	NM_001106389	Rn.163427	294408	ENSRNOT00000000471	TC597090	chr20:32274766-32274825	rn|20q11	1.65274	2.80088	2.80088	1.18149	1.00696	1.08299	2.34673	3.18855	5.07022	0.72486	1.48588	1.48588	0.240607	0.01	0.115015	1.23065	1.6729	2.34205
A_42_P677662	2.03725	1.00696	3.18074	1.01662	1.65936	0.00864996	Ttc30b	tetratricopeptide repeat domain 30B	GO:0005929(cilium)|GO:0030030(cell projection organization)	Rattus norvegicus tetratricopeptide repeat domain 30B (Ttc30b), mRNA [NM_001127607]		NM_001127607	NM_001127607	NM_001127607	Rn.87109	499814		TC583575	chr3:58602119-58602060	rn|3q23	1.65274	2.2295	2.2295	1.00696	1.00696	1.00696	4.5083	3.18855	1.84536	0.72486	1.15672	1.15672	0.01	0.01	0.01	2.17258	1.6729	0.883901
A_64_P099053	3.03485	1.38417	4.73931	1.1326	1.77565	0.00876679	LOC686031	hypothetical protein LOC686031		Rattus norvegicus hypothetical protein LOC686031 (LOC686031), mRNA [NM_001109490]		NM_001109490	NM_001109490	NM_001109490	Rn.218498	686031	ENSRNOT00000071062		chrX:47190338-47190279	rn|Xq21	2.38259	3.36098	3.36098	1.18149	1.00696	1.96408	6.7228	3.18855	4.30659	1.25253	1.74888	1.74888	0.240607	0.01	0.973851	2.74906	1.6729	2.10655
A_64_P015732	36.6121	15.8282	36.4908	1.20982	1.20503	0.00909375	Lnp	limb and neural patterns	GO:0003674(molecular_function)|GO:0005575(cellular_component)|GO:0007596(blood coagulation)|GO:0008150(biological_process)|GO:0035115(embryonic forelimb morphogenesis)|GO:0042733(embryonic digit morphogenesis)	Rattus norvegicus limb and neural patterns (Lnp), mRNA [NM_001077429]		NM_001077429	NM_001077429	NM_001077429	Rn.50581	362151	ENSRNOT00000068018	TC615701	chr3:57137289-57137230	rn|3q23	38.3074	35.7644	35.7644	22.4824	10.0949	14.9073	32.9034	45.5403	31.0285	5.25955	5.16045	5.16045	4.49073	3.33555	3.89795	5.04016	5.50907	4.95552
A_64_P064820	97.2053	8.10174	16.4201	3.58473	1.01916	0.00921409	Cacng1	calcium channel, voltage-dependent, gamma subunit 1	GO:0005245(voltage-gated calcium channel activity)|GO:0005891(voltage-gated calcium channel complex)	Rattus norvegicus calcium channel, voltage-dependent, gamma subunit 1 (Cacng1), mRNA [NM_019255]	04010:MAPK signaling pathway|04260:Cardiac muscle contraction|05410:Hypertrophic cardiomyopathy (HCM)|05412:Arrhythmogenic right ventricular cardiomyopathy (ARVC)|05414:Dilated cardiomyopathy	NM_019255	NM_019255	NM_019255	Rn.24079	29658	ENSRNOT00000004349	TC580739	chr10:97105767-97105708	rn|10q32.1	68.7871	111.414	111.414	7.44476	9.44647	7.41398	24.7929	3.18855	21.2787	6.10407	6.79979	6.79979	2.89623	3.23977	2.89025	4.63186	1.6729	4.41134
A_44_P886861	2.41816	1.00924	2.52295	1.26065	1.32185	0.00962681	Ccdc32	coiled-coil domain containing 32		Rattus norvegicus coiled-coil domain containing 32 (Ccdc32), mRNA [NM_001024245]		NM_001024245	NM_001024245	NM_001024245	Rn.154291	296081	ENSRNOT00000013963	TC575829	chr3:105523380-105523321	rn|3q35	1.65274	2.80088	2.80088	1.00696	1.0138	1.00696	1.68496	3.18855	2.69535	0.72486	1.48588	1.48588	0.01	0.0197766	0.01	0.752715	1.6729	1.43047
A_64_P152919	4.81596	1.06742	2.3718	2.1737	1.15186	0.0101117	Gprin3	GPRIN family member 3		PREDICTED: Rattus norvegicus similar to mKIAA2027 protein (RGD1565690), mRNA [XM_002726370]		XM_002726370	XM_002726370	XM_002726370		502784			chr4:88376415-88376356	rn|4q24	5.9983	4.2248	4.2248	1.18149	1.0138	1.00696	2.9199	3.18855	1.00696	2.58455	2.07888	2.07888	0.240607	0.0197766	0.01	1.54592	1.6729	0.01
A_44_P641262	26.0417	11.2722	28.6145	1.20806	1.34398	0.0110289	Gar1	GAR1 ribonucleoprotein homolog (yeast)	GO:0006364(rRNA processing)|GO:0009982(pseudouridine synthase activity)|GO:0015030(Cajal body)|GO:0030515(snoRNA binding)|GO:0031120(snRNA pseudouridine synthesis)|GO:0031429(box H/ACA snoRNP complex)|GO:0042254(ribosome biogenesis)	Rattus norvegicus GAR1 ribonucleoprotein homolog (yeast) (Gar1), mRNA [NM_001024306]	03008:Ribosome biogenesis in eukaryotes	NM_001024306	NM_001024306	NM_001024306	Rn.15522	499709	ENSRNOT00000013149	TC578892	chr2:227272918-227272859	rn|2q43	27.9586	25.0833	25.0833	11.122	11.5725	11.122	41.1147	16.7895	27.9392	4.80522	4.64866	4.64866	3.47535	3.53263	3.47535	5.36158	4.06949	4.80422
A_64_P114950	2.66145	1.09276	3.06003	1.28423	1.48557	0.0110359	Gpr45	G protein-coupled receptor 45	GO:0007186(G-protein coupled receptor signaling pathway)|GO:0016021(integral to membrane)	Rattus norvegicus G protein-coupled receptor 45 (Gpr45), mRNA [NM_001106906]		NM_001106906	NM_001106906	NM_001106906	Rn.147923	301372	ENSRNOT00000021999		chr9:42238114-42238173	rn|9q22	2.38259	2.80088	2.80088	1.18149	1.0138	1.08299	1.68496	3.18855	4.30659	1.25253	1.48588	1.48588	0.240607	0.0197766	0.115015	0.752715	1.6729	2.10655
A_64_P038872	39.4667	15.3166	2384.65	1.36554	7.28254	0.0110675	A2m	alpha-2-macroglobulin	GO:0001869(negative regulation of complement activation, lectin pathway)|GO:0004866(endopeptidase inhibitor activity)|GO:0004867(serine-type endopeptidase inhibitor activity)|GO:0005102(receptor binding)|GO:0005615(extracellular space)|GO:0006953(acute-phase response)|GO:0006954(inflammatory response)|GO:0007584(response to nutrient)|GO:0009611(response to wounding)|GO:0010037(response to carbon …	Rattus norvegicus alpha-2-macroglobulin (A2m), mRNA [NM_012488]	04610:Complement and coagulation cascades	NM_012488	NM_012488	NM_012488	Rn.225884	24153	ENSRNOT00000019346	TC573877	chr4:158153349-158153408	rn|4q42	42.6109	37.8946	37.8946	11.122	11.5725	23.2552	3104.56	3947.36	102.039	5.41315	5.24392	5.24392	3.47535	3.53263	4.53948	11.6002	11.9467	6.67298
A_44_P758470	27.939	8.01975	19.1885	1.80065	1.25862	0.0114295	Vopp1	vesicular, overexpressed in cancer, prosurvival protein 1	GO:0004871(signal transducer activity)|GO:0005768(endosome)|GO:0006351(transcription, DNA-dependent)|GO:0006355(regulation of transcription, DNA-dependent)|GO:0007165(signal transduction)|GO:0030659(cytoplasmic vesicle membrane)|GO:0031301(integral to organelle membrane)	Rattus norvegicus vesicular, overexpressed in cancer, prosurvival protein 1 (Vopp1), mRNA [NM_001108630]		NM_001108630	NM_001108630	NM_001108630	Rn.154707	362374	ENSRNOT00000008885	TC584826	chr4:87186426-87186485	rn|4q24	24.9524	29.4323	29.4323	7.97116	5.76148	10.3266	11.1356	30.8016	15.6284	4.6411	4.87933	4.87933	2.99479	2.52644	3.3683	3.47711	4.94493	3.9661
A_64_P033134	3.03485	1.38646	3.46407	1.13022	1.32107	0.0120682	Capn11	calpain 11	GO:0001669(acrosomal vesicle)|GO:0004198(calcium-dependent cysteine-type endopeptidase activity)|GO:0005509(calcium ion binding)|GO:0005622(intracellular)|GO:0006508(proteolysis)	Rattus norvegicus calpain 11 (Capn11), mRNA [NM_001002806]		NM_001002806	NM_001002806	NM_001002806	Rn.123410	408218	ENSRNOT00000065754	NP1396878	chr9:10963788-10963847	rn|9q12	2.38259	3.36098	3.36098	1.18149	1.0138	1.96408	4.5083	3.18855	2.69535	1.25253	1.74888	1.74888	0.240607	0.0197766	0.973851	2.17258	1.6729	1.43047
A_64_P100346	4.37203	1.38417	7.36143	1.65928	2.41096	0.0123992	Qrich2	glutamine rich 2		Uncharacterized protein [Source:UniProtKB/TrEMBL;Acc:D3ZG97] [ENSRNOT00000034817]		ENSRNOT00000034817	XM_577148	XM_577148		501747	ENSRNOT00000034817	TC608644	chr10:106550104-106550045	rn|10q32.3	2.92951	5.09329	5.09329	1.18149	1.00696	1.96408	10.0742	3.18855	8.8216	1.55066	2.3486	2.3486	0.240607	0.01	0.973851	3.33259	1.6729	3.14104
A_44_P128453	5.71129	1.34997	3.82943	2.08089	1.5042	0.0130065	Gcnt4	glucosaminyl (N-acetyl) transferase 4, core 2	GO:0002121(inter-male aggressive behavior)|GO:0008375(acetylglucosaminyltransferase activity)|GO:0016020(membrane)|GO:0042403(thyroid hormone metabolic process)|GO:0048729(tissue morphogenesis)|GO:0048872(homeostasis of number of cells)|GO:0060993(kidney morphogenesis)	PREDICTED: Rattus norvegicus beta-1,3-galactosyl-O-glycosyl-glycoprotein beta-1,6-N-acetylglucosaminyltransferase 4-like (RGD1563891), mRNA [XM_001069016]	00512:Mucin type O-Glycan biosynthesis|01100:Metabolic pathways	XM_001069016	XM_001069016	XM_001069016		310011			chr2:27440568-27440627	rn|2q12	2.92951	7.10218	7.10218	1.18149	1.78544	1.08299	5.60438	3.18855	2.69535	1.55066	2.82826	2.82826	0.240607	0.836282	0.115015	2.48655	1.6729	1.43047
A_64_P093567	5.15202	1.65328	3.40693	1.63981	1.04314	0.0133579	Spetex-2A	Spetex-2A protein		Rattus norvegicus Spetex-2A protein (Spetex-2A), mRNA [NM_001009976]		NM_001009976	NM_001009976	NM_001009976	Rn.198259	364261		TC591400	chr15:6104678-6104737	rn|15p16	3.52374	5.96616	5.96616	1.18149	2.69535	1.08299	3.51358	3.18855	3.51865	1.81711	2.5768	2.5768	0.240607	1.43047	0.115015	1.81294	1.6729	1.81502
A_64_P047944	3.61073	1.06513	6.15559	1.76125	2.53086	0.0145664	Cramp1l	Crm, cramped-like (Drosophila)	GO:0003682(chromatin binding)|GO:0005634(nucleus)	Uncharacterized protein [Source:UniProtKB/TrEMBL;Acc:D3ZNU3] [ENSRNOT00000022050]		ENSRNOT00000022050	XM_001058347	XM_001058347		287127	ENSRNOT00000022050		chr10:14215203-14215144	rn|10q12	2.38259	4.2248	4.2248	1.18149	1.00696	1.00696	11.7596	3.18855	3.51865	1.25253	2.07888	2.07888	0.240607	0.01	0.01	3.55576	1.6729	1.81502
A_44_P384462	3.71425	1.00696	2.29695	1.88307	1.18972	0.0149267	RGD1565713	similar to ribosomal protein L21	GO:0003735(structural constituent of ribosome)|GO:0005840(ribosome)|GO:0006412(translation)	Uncharacterized protein [Source:UniProtKB/TrEMBL;Acc:D3ZM68] [ENSRNOT00000048255]		ENSRNOT00000048255				290239	ENSRNOT00000048255		chr15:34066838-34066897	rn|15p13	4.42078	3.36098	3.36098	1.00696	1.00696	1.00696	1.00696	3.18855	2.69535	2.1443	1.74888	1.74888	0.01	0.01	0.01	0.01	1.6729	1.43047
A_64_P005802	2.41816	1.00696	2.23962	1.26391	1.15326	0.0150399	Sgk494	uncharacterized serine/threonine-protein kinase SgK494	GO:0004674(protein serine/threonine kinase activity)|GO:0005524(ATP binding)	PREDICTED: Rattus norvegicus uncharacterized LOC685208 (LOC685208), mRNA [XM_001062816]		XM_001062816	XM_001062816	XM_001062816		685208			chr10:64340513-64340454	rn|10q25	1.65274	2.80088	2.80088	1.00696	1.00696	1.00696	1.68496	3.18855	1.84536	0.72486	1.48588	1.48588	0.01	0.01	0.01	0.752715	1.6729	0.883901
A_42_P540908	2.2029	1.06513	5.96068	1.04837	2.48444	0.0153839	Asna1	arsA arsenite transporter, ATP-binding, homolog 1 (bacterial)		Rattus norvegicus arsA arsenite transporter, ATP-binding, homolog 1 (bacterial) (Asna1), mRNA [NM_001100505]		NM_001100505	NM_001100505	NM_001100505	Rn.7354	288919	ENSRNOT00000067518	TC612529	chr19:24787434-24792318	rn|19q11	1.00696	2.80088	2.80088	1.18149	1.00696	1.00696	9.62328	3.18855	5.07022	0.01	1.48588	1.48588	0.240607	0.01	0.01	3.26653	1.6729	2.34205
A_64_P054745	7.16732	1.32828	2.83403	2.43188	1.0933	0.0176847	Kin	antigenic determinant of rec-A protein homolog (mouse)	GO:0003690(double-stranded DNA binding)|GO:0003723(RNA binding)|GO:0005634(nucleus)|GO:0006260(DNA replication)|GO:0006974(response to DNA damage stimulus)|GO:0008270(zinc ion binding)|GO:0016363(nuclear matrix)	Rattus norvegicus antigenic determinant of rec-A protein homolog (mouse) (Kin), mRNA [NM_001109529]		NM_001109529	NM_001109529	NM_001109529	Rn.53701	689197	ENSRNOT00000039689	TC582416	chr17:79728622-79728563	rn|17q12.3	5.30935	8.0963	8.0963	1.00696	1.0138	1.96408	1.00696	3.18855	4.30659	2.40854	3.01726	3.01726	0.01	0.0197766	0.973851	0.01	1.6729	2.10655
A_44_P370267	20.9309	7.50981	31.2479	1.47879	2.05691	0.0177091	Ethe1	ethylmalonic encephalopathy 1	GO:0005634(nucleus)|GO:0005730(nucleolus)|GO:0005737(cytoplasm)|GO:0005739(mitochondrion)|GO:0016787(hydrolase activity)	Rattus norvegicus ethylmalonic encephalopathy 1 (Ethe1), nuclear gene encoding mitochondrial protein, mRNA [NM_001106234]		NM_001106234	NM_001106234	NM_001106234	Rn.14691	292710	ENSRNOT00000027075	TC584039	chr1:79876758-79887826	rn|1q21	16.2824	23.2552	23.2552	2.75636	9.44647	10.3266	22.5001	29.4323	41.8113	4.02524	4.53948	4.53948	1.46276	3.23977	3.3683	4.49186	4.87933	5.38582
A_44_P241583	4.95394	1.06742	2.3718	2.21445	1.15186	0.0177109	Setd2	SET domain containing 2	GO:0001525(angiogenesis)|GO:0001570(vasculogenesis)|GO:0001763(morphogenesis of a branching structure)|GO:0001843(neural tube closure)|GO:0003674(molecular_function)|GO:0005575(cellular_component)|GO:0005634(nucleus)|GO:0005694(chromosome)|GO:0006355(regulation of transcription, DNA-dependent)|GO:0008150(biological_process)|GO:0010452(histone H3-K36 methylation)|GO:0010468(regulation of gene expr…	Rattus norvegicus SET domain containing 2 (Setd2), mRNA [NM_001108189]	00310:Lysine degradation	NM_001108189	NM_001108189	NM_001108189	Rn.53471	316013	ENSRNOT00000028409	TC591358	chr8:114999210-114999269	rn|8q32	2.92951	5.96616	5.96616	1.18149	1.0138	1.00696	2.9199	3.18855	1.00696	1.55066	2.5768	2.5768	0.240607	0.0197766	0.01	1.54592	1.6729	0.01
A_44_P518127	3.03485	1.39561	3.72623	1.12073	1.41682	0.0191402	Wwtr1	WW domain containing transcription regulator 1	GO:0000122(negative regulation of transcription from RNA polymerase II promoter)|GO:0001649(osteoblast differentiation)|GO:0001933(negative regulation of protein phosphorylation)|GO:0003713(transcription coactivator activity)|GO:0003714(transcription corepressor activity)|GO:0005634(nucleus)|GO:0005667(transcription factor complex)|GO:0005730(nucleolus)|GO:0005737(cytoplasm)|GO:0006355(regulation…	Rattus norvegicus WW domain containing transcription regulator 1 (Wwtr1), mRNA [NM_001024869]		NM_001024869	NM_001024869	NM_001024869	Rn.9622	295062	ENSRNOT00000022507	TC578139	chr2:146719412-146717947	rn|2q31	2.38259	3.36098	3.36098	2.16607	1.0138	1.00696	2.9199	3.18855	5.07022	1.25253	1.74888	1.74888	1.11508	0.0197766	0.01	1.54592	1.6729	2.34205
A_64_P056082	3.48577	1.0323	3.53517	1.75562	1.77592	0.0193452	Cetn4	centrin 4	GO:0003676(nucleic acid binding)|GO:0005509(calcium ion binding)|GO:0005524(ATP binding)|GO:0005814(centriole)|GO:0005932(microtubule basal body)|GO:0008026(ATP-dependent helicase activity)|GO:0031683(G-protein beta/gamma-subunit complex binding)|GO:0032795(heterotrimeric G-protein binding)	Rattus norvegicus centrin 4 (Cetn4), mRNA [NM_001271151]		NM_001271151	NM_001271151	NM_001271151	Rn.224210	688611	ENSRNOT00000065384	TC606095	chr2:123857525-123857466	rn|2q25	5.9983	2.2295	2.2295	1.00696	1.00696	1.08299	2.34673	3.18855	5.07022	2.58455	1.15672	1.15672	0.01	0.01	0.115015	1.23065	1.6729	2.34205
A_43_P13146	3.79303	1.09048	2.29695	1.79839	1.07476	0.0212417	Atp2c1	ATPase, Ca++ transporting, type 2C, member 1	GO:0000139(Golgi membrane)|GO:0004871(signal transducer activity)|GO:0005388(calcium-transporting ATPase activity)|GO:0005509(calcium ion binding)|GO:0005524(ATP binding)|GO:0005794(Golgi apparatus)|GO:0005802(trans-Golgi network)|GO:0005886(plasma membrane)|GO:0006754(ATP biosynthetic process)|GO:0006816(calcium ion transport)|GO:0006828(manganese ion transport)|GO:0006874(cellular calcium ion h…	Rattus norvegicus ATPase, Ca++ transporting, type 2C, member 1 (Atp2c1), mRNA [NM_131907]		NM_131907	NM_131907	NM_131907	Rn.5805	170699	ENSRNOT00000045087	TC581575	chr8:110516206-110516147	rn|8q32	2.92951	4.2248	4.2248	1.18149	1.00696	1.08299	1.00696	3.18855	2.69535	1.55066	2.07888	2.07888	0.240607	0.01	0.115015	0.01	1.6729	1.43047
A_64_P122168	3.94644	1.06513	2.74354	1.88952	1.36501	0.0215396	Lhx6	LIM homeobox 6	GO:0003700(sequence-specific DNA binding transcription factor activity)|GO:0005634(nucleus)|GO:0008270(zinc ion binding)|GO:0021799(cerebral cortex radially oriented cell migration)|GO:0021800(cerebral cortex tangential migration)|GO:0021853(cerebral cortex GABAergic interneuron migration)|GO:0021877(forebrain neuron fate commitment)|GO:0021884(forebrain neuron development)|GO:0021895(cerebral co…	Rattus norvegicus LIM homeobox 6 (Lhx6), mRNA [NM_001107837]		NM_001107837	NM_001107837	NM_001107837	Rn.214085	311901			chr3:15192674-15192615	rn|3p11	1.65274	5.09329	5.09329	1.18149	1.00696	1.00696	2.34673	3.18855	2.69535	0.72486	2.3486	2.3486	0.240607	0.01	0.01	1.23065	1.6729	1.43047
A_43_P12418	4.52835	1.00696	3.01798	2.16899	1.58358	0.0216499	Mst1	Macrophage stimulating 1 (hepatocyte growth factor-like)	GO:0004252(serine-type endopeptidase activity)|GO:0006508(proteolysis)|GO:0007283(spermatogenesis)|GO:0007566(embryo implantation)|GO:0030317(sperm motility)	Rattus norvegicus Macrophage stimulating 1 (hepatocyte growth factor-like) (Mst1), mRNA [NM_024352]		NM_024352	NM_024352	NM_024352	Rn.10613	24566	ENSRNOT00000026711	TC575993	chr8:113352706-113352765	rn|8q32	1.65274	5.96616	5.96616	1.00696	1.00696	1.00696	2.34673	3.18855	3.51865	0.72486	2.5768	2.5768	0.01	0.01	0.01	1.23065	1.6729	1.81502
A_64_P030689	17.5356	8.03275	21.1896	1.12632	1.39939	0.0228042	Cd8b	CD8b molecule	GO:0009897(external side of plasma membrane)|GO:0009986(cell surface)|GO:0016021(integral to membrane)	Rattus norvegicus CD8b molecule (Cd8b), mRNA [NM_031539]	04514:Cell adhesion molecules (CAMs)|04612:Antigen processing and presentation|04640:Hematopoietic cell lineage|04660:T cell receptor signaling pathway|05340:Primary immunodeficiency	NM_031539	NM_031539	NM_031539	Rn.10330	24931	ENSRNOT00000009392	TC579217	chr4:104542505-104542564	rn|4q33	22.4824	15.0622	15.0622	6.6437	8.32253	9.13202	11.7596	25.1762	26.6331	4.49073	3.91286	3.91286	2.73199	3.05702	3.19093	3.55576	4.65399	4.73515
A_44_P470149	3.61073	1.58549	3.20904	1.18736	1.01721	0.0229709	Ube2wl	ubiquitin-conjugating enzyme E2W-like		PREDICTED: Rattus norvegicus ubiquitin-conjugating enzyme E2 W-like (LOC680426), mRNA [XM_001057119]	04120:Ubiquitin mediated proteolysis	XM_001057119	XM_001057119	XM_001057119	Rn.225229	680426		TC627073	chrX:29825044-29825103	rn|Xq14	2.38259	4.2248	4.2248	1.00696	1.78544	1.96408	2.9199	3.18855	3.51865	1.25253	2.07888	2.07888	0.01	0.836282	0.973851	1.54592	1.6729	1.81502
A_43_P15431	2.84375	1.32463	3.04602	1.10221	1.20134	0.0231523	Mterf	mitochondrial transcription termination factor	GO:0003690(double-stranded DNA binding)|GO:0005739(mitochondrion)|GO:0006353(transcription termination, DNA-dependent)|GO:0006355(regulation of transcription, DNA-dependent)|GO:0006393(termination of mitochondrial transcription)|GO:0032392(DNA geometric change)|GO:0042645(mitochondrial nucleoid)	Rattus norvegicus mitochondrial transcription termination factor (Mterf), nuclear gene encoding mitochondrial protein, mRNA [NM_053499]		NM_053499	NM_053499	NM_053499	Rn.64629	85261	ENSRNOT00000010425	TC578262	chr4:26948993-26949052	rn|4q13	2.92951	2.80088	2.80088	1.18149	1.78544	1.00696	4.10415	3.18855	1.84536	1.55066	1.48588	1.48588	0.240607	0.836282	0.01	2.03708	1.6729	0.883901
A_64_P154297	3.79303	1.00696	2.56969	1.91335	1.3516	0.0233097	Iqgap3	IQ motif containing GTPase activating protein 3	GO:0000082(G1/S transition of mitotic cell cycle)|GO:0000187(activation of MAPK activity)|GO:0001934(positive regulation of protein phosphorylation)|GO:0005099(Ras GTPase activator activity)|GO:0005737(cytoplasm)|GO:0005911(cell-cell junction)|GO:0007265(Ras protein signal transduction)|GO:0008361(regulation of cell size)|GO:0010628(positive regulation of gene expression)|GO:0010629(negative regu…	Rattus norvegicus IQ motif containing GTPase activating protein 3 (Iqgap3), mRNA [NM_001191709]	04810:Regulation of actin cytoskeleton	NM_001191709	NM_001191709	NM_001191709	Rn.17539	310621	ENSRNOT00000038589	TC593158	chr2:180198622-180198681	rn|2q34	2.92951	4.2248	4.2248	1.00696	1.00696	1.00696	3.51358	3.18855	1.00696	1.55066	2.07888	2.07888	0.01	0.01	0.01	1.81294	1.6729	0.01
A_64_P074275	2.79157	1.26645	3.46407	1.14028	1.45168	0.024184	Lrrtm4	leucine rich repeat transmembrane neuronal 4	GO:0005886(plasma membrane)|GO:0016021(integral to membrane)|GO:0030054(cell junction)|GO:0032281(alpha-amino-3-hydroxy-5-methyl-4-isoxazolepropionic acid selective glutamate receptor complex)|GO:0045211(postsynaptic membrane)|GO:0050808(synapse organization)	Rattus norvegicus leucine rich repeat transmembrane neuronal 4 (Lrrtm4), mRNA [NM_001134746]		NM_001134746	NM_001134746	NM_001134746	Rn.140910	500219	ENSRNOT00000030588		chr4:114145401-114145460	rn|4q34	1.65274	3.36098	3.36098	1.00696	1.78544	1.00696	4.5083	3.18855	2.69535	0.72486	1.74888	1.74888	0.01	0.836282	0.01	2.17258	1.6729	1.43047
A_44_P463659	4.5701	2.27517	5.51892	1.00625	1.27842	0.0283209	Cmtm6	CKLF-like MARVEL transmembrane domain containing 6	GO:0016021(integral to membrane)	Rattus norvegicus CKLF-like MARVEL transmembrane domain containing 6 (Cmtm6), mRNA [NM_001007802]		NM_001007802	NM_001007802	NM_001007802	Rn.98431	316035	ENSRNOT00000014585	NP831138	chr8:119157834-119165417	rn|8q32	3.52374	5.09329	5.09329	2.16607	2.69535	1.96408	7.36992	3.18855	5.9983	1.81711	2.3486	2.3486	1.11508	1.43047	0.973851	2.88165	1.6729	2.58455
A_64_P029377	4.52835	1.00696	2.46021	2.16899	1.28878	0.0287968	Hrh4	histamine receptor H4	GO:0004969(histamine receptor activity)|GO:0005886(plasma membrane)|GO:0006954(inflammatory response)|GO:0007186(G-protein coupled receptor signaling pathway)|GO:0016020(membrane)|GO:0016021(integral to membrane)	Rattus norvegicus histamine receptor H4 (Hrh4), mRNA [NM_131909]	04080:Neuroactive ligand-receptor interaction	NM_131909	NM_131909	NM_131909	Rn.162272	170704	ENSRNOT00000022744	TC577934	chr18:4292164-4292223	rn|18p13	1.65274	5.96616	5.96616	1.00696	1.00696	1.00696	2.34673	3.18855	1.84536	0.72486	2.5768	2.5768	0.01	0.01	0.01	1.23065	1.6729	0.883901
A_64_P063463	3.48577	1.00696	2.23962	1.79148	1.15326	0.0300029	Sgpl1	sphingosine-1-phosphate lyase 1	GO:0001553(luteinization)|GO:0001570(vasculogenesis)|GO:0001822(kidney development)|GO:0005783(endoplasmic reticulum)|GO:0005789(endoplasmic reticulum membrane)|GO:0006672(ceramide metabolic process)|GO:0006807(nitrogen compound metabolic process)|GO:0006915(apoptotic process)|GO:0007283(spermatogenesis)|GO:0008117(sphinganine-1-phosphate aldolase activity)|GO:0008209(androgen metabolic process)|…	Rattus norvegicus sphingosine-1-phosphate lyase 1 (Sgpl1), mRNA [NM_173116]	00600:Sphingolipid metabolism|01100:Metabolic pathways	NM_173116	NM_173116	NM_173116	Rn.26953	286896	ENSRNOT00000065127	TC581226	chr20:28460021-28459962	rn|20q11	5.9983	2.2295	2.2295	1.00696	1.00696	1.00696	1.68496	3.18855	1.84536	2.58455	1.15672	1.15672	0.01	0.01	0.01	0.752715	1.6729	0.883901
A_64_P148473	3.41523	1.39333	3.04602	1.29345	1.12839	0.0307112	Tanc1	tetratricopeptide repeat, ankyrin repeat and coiled-coil containing 1	GO:0005515(protein binding)|GO:0005886(plasma membrane)|GO:0007520(myoblast fusion)|GO:0008542(visual learning)|GO:0014069(postsynaptic density)|GO:0030054(cell junction)|GO:0030425(dendrite)|GO:0043025(neuronal cell body)|GO:0043679(axon terminus)|GO:0045211(postsynaptic membrane)|GO:0097062(dendritic spine maintenance)	Rattus norvegicus tetratricopeptide repeat, ankyrin repeat and coiled-coil containing 1 (Tanc1), mRNA [NM_001002854]		NM_001002854	NM_001002854	NM_001002854	Rn.161791	311055	ENSRNOT00000038983	TC573704	chr3:41563596-41563655	rn|3q21	3.52374	3.36098	3.36098	2.16607	1.00696	1.00696	4.10415	3.18855	1.84536	1.81711	1.74888	1.74888	1.11508	0.01	0.01	2.03708	1.6729	0.883901
A_44_P219628	3.34084	1.06742	2.18074	1.64609	1.0307	0.0309649	Ggt1	gamma-glutamyltransferase 1	GO:0002682(regulation of immune system process)|GO:0003840(gamma-glutamyltransferase activity)|GO:0005615(extracellular space)|GO:0005887(integral to plasma membrane)|GO:0006750(glutathione biosynthetic process)|GO:0007283(spermatogenesis)|GO:0007568(aging)|GO:0016787(hydrolase activity)|GO:0019344(cysteine biosynthetic process)|GO:0019370(leukotriene biosynthetic process)|GO:0031179(peptide modi…	Rattus norvegicus gamma-glutamyltransferase 1 (Ggt1), mRNA [NM_053840]		NM_053840	NM_053840	NM_053840	Rn.10010	116568		TC577607	00430:Taurine and hypotaurine metabolism|00460:Cyanoamino acid metabolism|00480:Glutathione metabolism|00590:Arachidonic acid metabolism|01100:Metabolic pathways		4.42078	2.80088	2.80088	1.18149	1.0138	1.00696	2.34673	3.18855	1.00696	2.1443	1.48588	1.48588	0.240607	0.0197766	0.01	1.23065	1.6729	0.01
A_44_P436078	3.99111	1.32463	3.62394	1.5912	1.45197	0.0318944	Cutc	cutC copper transporter homolog (E.coli)	GO:0003674(molecular_function)|GO:0005507(copper ion binding)|GO:0005575(cellular_component)|GO:0005634(nucleus)|GO:0005730(nucleolus)|GO:0005737(cytoplasm)|GO:0008150(biological_process)|GO:0016235(aggresome)|GO:0051262(protein tetramerization)|GO:0055070(copper ion homeostasis)	Rattus norvegicus cutC copper transporter homolog (E.coli) (Cutc), mRNA [NM_001108525]		NM_001108525	NM_001108525	NM_001108525	Rn.13248	361760	ENSRNOT00000023396	TC588290	chr1:247062678-247062619	rn|1q54	3.52374	4.2248	4.2248	1.18149	1.78544	1.00696	1.68496	3.18855	5.9983	1.81711	2.07888	2.07888	0.240607	0.836282	0.01	0.752715	1.6729	2.58455
A_42_P560984	21.0891	9.65645	27.3371	1.12693	1.5013	0.0324038	RGD1565641	RGD1565641		Rattus norvegicus RGD1565641 (RGD1565641), mRNA [NM_001109179]		NM_001109179	NM_001109179	NM_001109179	Rn.145579	499567	ENSRNOT00000059467	TC618813	chr2:88346156-88346215	rn|2q23	9.67086	26.7981	26.7981	9.95921	8.32253	10.6876	32.123	23.2552	26.6331	3.27364	4.74406	4.74406	3.31603	3.05702	3.41787	5.00554	4.53948	4.73515
A_64_P138056	892.048	409.942	839.668	1.1217	1.0344	0.0331602	LOC367812	similar to Sphingosine kinase 2 (SK 2) (SPK 2)		PREDICTED: Rattus norvegicus sphingosine kinase 2-like (LOC367812), misc_RNA [XR_146464]		XR_146464	XR_146464	XR_146464		367812			chrX:66843749-66843808	rn|Xq22	964.41	855.867	855.867	369.352	450.166	410.306	852.393	1202.61	463.999	9.9135	9.74124	9.74124	8.52885	8.81431	8.68056	9.73537	10.232	8.85798
A_64_P140977	4.29012	1.71237	4.20223	1.32503	1.29516	0.0345757	Prune	prune homolog (Drosophila)	GO:0003674(molecular_function)|GO:0004427(inorganic diphosphatase activity)|GO:0005575(cellular_component)|GO:0005634(nucleus)|GO:0005737(cytoplasm)|GO:0005925(focal adhesion)|GO:0008150(biological_process)|GO:0030145(manganese ion binding)	Rattus norvegicus prune homolog (Drosophila) (Prune), mRNA [NM_001007697]	00230:Purine metabolism	NM_001007697	NM_001007697	NM_001007697	Rn.214534	310664	ENSRNOT00000028677	TC577546	chr2:190165416-190165357	rn|2q34	4.42078	4.2248	4.2248	2.16607	1.00696	1.96408	6.7228	3.18855	2.69535	2.1443	2.07888	2.07888	1.11508	0.01	0.973851	2.74906	1.6729	1.43047
A_44_P238286	4.52835	1.00696	2.23962	2.16899	1.15326	0.0352607	Olr287	olfactory receptor 287	GO:0004930(G-protein coupled receptor activity)|GO:0004984(olfactory receptor activity)|GO:0005549(odorant binding)|GO:0005886(plasma membrane)|GO:0016021(integral to membrane)	Rattus norvegicus olfactory receptor 287 (Olr287), mRNA [NM_173334]	04740:Olfactory transduction	NM_173334	NM_173334	NM_173334	Rn.44382	287001	ENSRNOT00000025635	TC580183	chr1:200002686-200002745	rn|1q41	1.65274	5.96616	5.96616	1.00696	1.00696	1.00696	1.68496	3.18855	1.84536	0.72486	2.5768	2.5768	0.01	0.01	0.01	0.752715	1.6729	0.883901
A_64_P118256	3.61073	1.00696	2.56969	1.84229	1.3516	0.0366738	LOC100911762	coiled-coil domain-containing protein 72-like		PREDICTED: Rattus norvegicus coiled-coil domain-containing protein 72-like (LOC100911762), mRNA [XM_003750588]		XM_003750588	XM_003750588	XM_003750588		100911762		TC597363	chr8:114091018-114090959	rn|8q32	2.38259	4.2248	4.2248	1.00696	1.00696	1.00696	3.51358	3.18855	1.00696	1.25253	2.07888	2.07888	0.01	0.01	0.01	1.81294	1.6729	0.01
A_64_P111701	3.94644	1.06513	2.79739	1.88952	1.39305	0.0375149	Olr276	olfactory receptor 276	GO:0004984(olfactory receptor activity)|GO:0007186(G-protein coupled receptor signaling pathway)|GO:0016021(integral to membrane)|GO:0050911(detection of chemical stimulus involved in sensory perception of smell)	Rattus norvegicus olfactory receptor 276 (Olr276), mRNA [NM_001000227]	04740:Olfactory transduction	NM_001000227	NM_001000227	NM_001000227	Rn.141763	293431		NP1479366	chr1:166084513-166084572	rn|1q33	1.65274	5.09329	5.09329	1.18149	1.00696	1.00696	1.68496	3.18855	3.51865	0.72486	2.3486	2.3486	0.240607	0.01	0.01	0.752715	1.6729	1.81502
A_64_P149855	5.22333	1.06513	2.57139	2.29394	1.27151	0.0376877	Avl9	AVL9 homolog (S. cerevisiase)	GO:0016477(cell migration)|GO:0055037(recycling endosome)	PREDICTED: Rattus norvegicus similar to mKIAA0241 protein (RGD1564615), mRNA [XM_002726368]		XM_002726368	XM_002726368	XM_002726368		312371			chr4:85707804-85707863	rn|4q24	2.38259	6.6437	6.6437	1.18149	1.00696	1.00696	1.00696	3.18855	3.51865	1.25253	2.73199	2.73199	0.240607	0.01	0.01	0.01	1.6729	1.81502
A_64_P093832	2.2029	1.06513	4.59708	1.04837	2.10968	0.0378604	Chd2	chromodomain helicase DNA binding protein 2		Rattus norvegicus chromodomain helicase DNA binding protein 2 (Chd2), mRNA [NM_001107523]		NM_001107523	NM_001107523	NM_001107523	Rn.225034	308738	ENSRNOT00000055829	TC609529	chr1:128635247-128635188	rn|1q31	1.00696	2.80088	2.80088	1.18149	1.00696	1.00696	7.90733	3.18855	2.69535	0.01	1.48588	1.48588	0.240607	0.01	0.01	2.98319	1.6729	1.43047
A_44_P283186	47.7193	15.4182	68.3523	1.62993	2.14835	0.0381805	Cpa5	carboxypeptidase A5	GO:0008152(metabolic process)|GO:0008233(peptidase activity)	Rattus norvegicus carboxypeptidase A5 (Cpa5), mRNA [NM_001002808]		NM_001002808	NM_001002808	NM_001002808	Rn.125844	408212	ENSRNOT00000013948	TC576395	chr4:57540000-57540059	rn|4q22	61.544	40.8069	40.8069	26.7549	9.44647	10.0533	98.3343	81.4457	25.2767	5.94355	5.35074	5.35074	4.74173	3.23977	3.3296	6.61962	6.34777	4.65974
A_42_P606073	3.63703	1.58549	3.46407	1.19783	1.12754	0.0383254	Acadvl	acyl-CoA dehydrogenase, very long chain	GO:0000062(fatty-acyl-CoA binding)|GO:0001659(temperature homeostasis)|GO:0003995(acyl-CoA dehydrogenase activity)|GO:0004466(long-chain-acyl-CoA dehydrogenase activity)|GO:0005739(mitochondrion)|GO:0005743(mitochondrial inner membrane)|GO:0006635(fatty acid beta-oxidation)|GO:0017099(very-long-chain-acyl-CoA dehydrogenase activity)|GO:0033539(fatty acid beta-oxidation using acyl-CoA dehydrogenas…	Rattus norvegicus acyl-CoA dehydrogenase, very long chain (Acadvl), nuclear gene encoding mitochondrial protein, mRNA [NM_012891]	00071:Fatty acid metabolism|01100:Metabolic pathways	NM_012891	NM_012891	NM_012891	Rn.33319	25363	ENSRNOT00000024973	TC605909	chr10:56856406-56856347	rn|10q24	5.30935	2.80088	2.80088	1.00696	1.78544	1.96408	4.5083	3.18855	2.69535	2.40854	1.48588	1.48588	0.01	0.836282	0.973851	2.17258	1.6729	1.43047
A_44_P501015	3.99111	1.42095	3.31458	1.48993	1.22197	0.0387996	Olr1549	olfactory receptor 1549	GO:0004930(G-protein coupled receptor activity)|GO:0004984(olfactory receptor activity)|GO:0005886(plasma membrane)|GO:0007186(G-protein coupled receptor signaling pathway)|GO:0016021(integral to membrane)|GO:0050911(detection of chemical stimulus involved in sensory perception of smell)	Rattus norvegicus olfactory receptor 1549 (Olr1549), mRNA [NM_001000052]	04740:Olfactory transduction	NM_001000052	NM_001000052	NM_001000052	Rn.142260	288196	ENSRNOT00000060880	TC580560	chr11:42189289-42189348	rn|11q12	3.52374	4.2248	4.2248	2.16607	1.0138	1.08299	1.68496	3.18855	5.07022	1.81711	2.07888	2.07888	1.11508	0.0197766	0.115015	0.752715	1.6729	2.34205
A_64_P128710	3.04183	1.06513	2.3718	1.51391	1.15495	0.0396579	Olr198	olfactory receptor 198	GO:0004930(G-protein coupled receptor activity)|GO:0004984(olfactory receptor activity)|GO:0007186(G-protein coupled receptor signaling pathway)|GO:0016021(integral to membrane)|GO:0050911(detection of chemical stimulus involved in sensory perception of smell)	Rattus norvegicus olfactory receptor 198 (Olr198), mRNA [NM_001001033]	04740:Olfactory transduction	NM_001001033	NM_001001033	NM_001001033	Rn.141813	405919	ENSRNOT00000041317	NP1396619	chr1:163005640-163005699	rn|1q33	3.52374	2.80088	2.80088	1.18149	1.00696	1.00696	2.9199	3.18855	1.00696	1.81711	1.48588	1.48588	0.240607	0.01	0.01	1.54592	1.6729	0.01
A_64_P128971	3.04183	1.06513	2.3718	1.51391	1.15495	0.0396579	Chst13	carbohydrate (chondroitin 4) sulfotransferase 13	GO:0001537(N-acetylgalactosamine 4-O-sulfotransferase activity)|GO:0016021(integral to membrane)|GO:0016051(carbohydrate biosynthetic process)|GO:0030206(chondroitin sulfate biosynthetic process)|GO:0047756(chondroitin 4-sulfotransferase activity)	Rattus norvegicus carbohydrate (chondroitin 4) sulfotransferase 13 (Chst13), mRNA [NM_001191974]	00532:Glycosaminoglycan biosynthesis - chondroitin sulfate|00920:Sulfur metabolism	NM_001191974	NM_001191974	NM_001191974	Rn.160748	500257	ENSRNOT00000029915		chr4:124578247-124578188	rn|4q34	3.52374	2.80088	2.80088	1.18149	1.00696	1.00696	2.9199	3.18855	1.00696	1.81711	1.48588	1.48588	0.240607	0.01	0.01	1.54592	1.6729	0.01
A_44_P426529	19.3772	5.52198	14.1896	1.8111	1.36158	0.0400502	Me3	malic enzyme 3, NADP(+)-dependent, mitochondrial	GO:0004470(malic enzyme activity)|GO:0004473(malate dehydrogenase (oxaloacetate-decarboxylating) (NADP+) activity)|GO:0005739(mitochondrion)|GO:0006090(pyruvate metabolic process)|GO:0006108(malate metabolic process)|GO:0016619(malate dehydrogenase (oxaloacetate-decarboxylating) activity)|GO:0046872(metal ion binding)|GO:0051287(NAD binding)|GO:0055114(oxidation-reduction process)	Rattus norvegicus malic enzyme 3, NADP(+)-dependent, mitochondrial (Me3), nuclear gene encoding mitochondrial protein, mRNA [NM_001108491]	00620:Pyruvate metabolism|01100:Metabolic pathways	NM_001108491	NM_001108491	NM_001108491	Rn.198167	361602	ENSRNOT00000023329	TC590575	chr1:146422480-146422539	rn|1q32	11.6211	23.2552	23.2552	6.6437	5.76148	4.16076	9.62328	25.1762	7.76939	3.53868	4.53948	4.53948	2.73199	2.52644	2.05685	3.26653	4.65399	2.9578
A_44_P135730	3.61073	1.03458	2.57139	1.80324	1.3135	0.0402771	RGD1561594	similar to testis-specific farnesyl pyrophosphate synthetase		PREDICTED: Rattus norvegicus farnesyl pyrophosphate synthase-like (RGD1561594), misc_RNA [XR_146458]		XR_146458	XR_146458	XR_146458	Rn.232564	317394			chrX:27868796-27868855	rn|Xq13	2.38259	4.2248	4.2248	1.00696	1.0138	1.08299	1.00696	3.18855	3.51865	1.25253	2.07888	2.07888	0.01	0.0197766	0.115015	0.01	1.6729	1.81502
A_64_P039432	14.9527	7.32774	23.6899	1.02896	1.69283	0.0403917	Clk1	CDC-like kinase 1	GO:0003674(molecular_function)|GO:0004674(protein serine/threonine kinase activity)|GO:0004713(protein tyrosine kinase activity)|GO:0005524(ATP binding)|GO:0005634(nucleus)|GO:0005737(cytoplasm)|GO:0008150(biological_process)|GO:0018105(peptidyl-serine phosphorylation)|GO:0018107(peptidyl-threonine phosphorylation)|GO:0018108(peptidyl-tyrosine phosphorylation)|GO:0043484(regulation of RNA splicin…	Rattus norvegicus CDC-like kinase 1 (Clk1), mRNA [NM_001106913]		NM_001106913	NM_001106913	NM_001106913	Rn.36770	301434	ENSRNOT00000030934	TC593495	chr9:57071074-57071015	rn|9q31	11.1115	16.8732	16.8732	2.75636	10.0949	9.13202	16.5057	25.1762	29.3878	3.47399	4.07666	4.07666	1.46276	3.33555	3.19093	4.0449	4.65399	4.87715
A_64_P068458	3.63703	1.06513	2.3718	1.77173	1.15495	0.0404947	Emc1	ER membrane protein complex subunit 1	GO:0016021(integral to membrane)|GO:0072546(ER membrane protein complex)	Rattus norvegicus ER membrane protein complex subunit 1 (Emc1), mRNA [NM_001108690]		NM_001108690	NM_001108690	NM_001108690	Rn.42115	362643	ENSRNOT00000068168	TC599324	chr5:158178624-158178683	rn|5q36	5.30935	2.80088	2.80088	1.18149	1.00696	1.00696	2.9199	3.18855	1.00696	2.40854	1.48588	1.48588	0.240607	0.01	0.01	1.54592	1.6729	0.01
A_64_P084273	3.03485	1.32463	3.06003	1.19604	1.20796	0.0407172	LOC686437	similar to Protein C14orf105		PREDICTED: Rattus norvegicus uncharacterized LOC686437 (LOC686437), mRNA [XM_001074093]		XM_001074093	XM_001074093	XM_001074093		686437			chr7:068228230-068228171	rn|7q22	2.38259	3.36098	3.36098	1.18149	1.78544	1.00696	1.68496	3.18855	4.30659	1.25253	1.74888	1.74888	0.240607	0.836282	0.01	0.752715	1.6729	2.10655
A_64_P038379	3.79303	1.65282	3.53517	1.19842	1.09685	0.0410954	Tox	thymocyte selection-associated high mobility group box		Rattus norvegicus thymocyte selection-associated high mobility group box (Tox), mRNA [NM_001108654]		NM_001108654	NM_001108654	NM_001108654	Rn.161967	362481	ENSRNOT00000014661	TC594716	chr5:20314666-20314607	rn|5q13	2.92951	4.2248	4.2248	2.16607	1.78544	1.00696	2.34673	3.18855	5.07022	1.55066	2.07888	2.07888	1.11508	0.836282	0.01	1.23065	1.6729	2.34205
A_64_P024252	3.25612	1.39333	3.60379	1.22462	1.37098	0.0413188	Tsc2	tuberous sclerosis 2	GO:0001666(response to hypoxia)|GO:0001843(neural tube closure)|GO:0005096(GTPase activator activity)|GO:0005097(Rab GTPase activator activity)|GO:0005515(protein binding)|GO:0005622(intracellular)|GO:0005634(nucleus)|GO:0005737(cytoplasm)|GO:0005794(Golgi apparatus)|GO:0005829(cytosol)|GO:0005901(caveola)|GO:0006469(negative regulation of protein kinase activity)|GO:0006606(protein import into n…	Rattus norvegicus tuberous sclerosis 2 (Tsc2), mRNA [NM_012680]	04115:p53 signaling pathway|04150:mTOR signaling pathway|04910:Insulin signaling pathway	NM_012680	NM_012680	NM_012680	Rn.5875	24855	ENSRNOT00000016221	TC573716	chr10:13848316-13848257	rn|10q12	5.30935	2.2295	2.2295	2.16607	1.00696	1.00696	4.10415	3.18855	3.51865	2.40854	1.15672	1.15672	1.11508	0.01	0.01	2.03708	1.6729	1.81502
A_44_P258277	35.509	15.7981	46.9683	1.16843	1.57193	0.0423181	Dhrs7b	dehydrogenase/reductase (SDR family) member 7B	GO:0000166(nucleotide binding)|GO:0005778(peroxisomal membrane)|GO:0016021(integral to membrane)|GO:0016491(oxidoreductase activity)	Rattus norvegicus dehydrogenase/reductase (SDR family) member 7B (Dhrs7b), mRNA [NM_001008507]		NM_001008507	NM_001008507	NM_001008507	Rn.203124	287380	ENSRNOT00000066250	TC623115	chr10:46992797-46992856	rn|10q22	30.738	37.8946	37.8946	25.1342	11.5725	10.6876	37.8489	76.4227	26.6331	4.94195	5.24392	5.24392	4.65158	3.53263	3.41787	5.24218	6.25593	4.73515
A_64_P157873	3.63703	1.32463	5.16906	1.45717	1.96431	0.046234	Nhlh2	nescient helix loop helix 2	GO:0001102(RNA polymerase II activating transcription factor binding)|GO:0003674(molecular_function)|GO:0005575(cellular_component)|GO:0007617(mating behavior)|GO:0008150(biological_process)|GO:0042698(ovulation cycle)|GO:0046983(protein dimerization activity)	Rattus norvegicus nescient helix loop helix 2 (Nhlh2), mRNA [NM_001106457]		NM_001106457	NM_001106457	NM_001106457	Rn.126884	295327	ENSRNOT00000021727	TC607503	chr2:197102365-197102424	rn|2q34	5.30935	2.80088	2.80088	1.18149	1.78544	1.00696	9.62328	3.18855	2.69535	2.40854	1.48588	1.48588	0.240607	0.836282	0.01	3.26653	1.6729	1.43047
A_44_P445238	21.7318	7.33498	15.3811	1.56695	1.0683	0.047974	Slc4a7	solute carrier family 4, sodium bicarbonate cotransporter, member 7	GO:0005452(inorganic anion exchanger activity)|GO:0005737(cytoplasm)|GO:0006814(sodium ion transport)|GO:0007601(visual perception)|GO:0015293(symporter activity)|GO:0016021(integral to membrane)|GO:0016323(basolateral plasma membrane)|GO:0016324(apical plasma membrane)|GO:0021747(cochlear nucleus development)|GO:0031410(cytoplasmic vesicle)|GO:0032420(stereocilium)|GO:0046666(retinal cell progra…	Rattus norvegicus solute carrier family 4, sodium bicarbonate cotransporter, member 7 (Slc4a7), transcript variant 1, mRNA [NM_058211]		NM_058211	NM_058211	NM_058211	Rn.26856	117955	ENSRNOT00000049771	NP185449	chr15:12087723-12084114	rn|15p16	15.0289	25.0833	25.0833	9.95921	5.76148	6.28425	7.36992	15.276	23.4975	3.90967	4.64866	4.64866	3.31603	2.52644	2.65174	2.88165	3.93319	4.55444
A_44_P429781	4.2643	1.09048	2.29695	1.96735	1.07476	0.049027	Naa35	N(alpha)-acetyltransferase 35, NatC auxiliary subunit	GO:0005634(nucleus)|GO:0005730(nucleolus)|GO:0005737(cytoplasm)|GO:0005886(plasma membrane)|GO:0048659(smooth muscle cell proliferation)	Rattus norvegicus N(alpha)-acetyltransferase 35, NatC auxiliary subunit (Naa35), mRNA [NM_133324]		NM_133324	NM_133324	NM_133324	Rn.73698	64472	ENSRNOT00000025096	TC617070	chr17:10941305-10941246	rn|17p14	7.19116	2.80088	2.80088	1.18149	1.00696	1.08299	1.00696	3.18855	2.69535	2.84622	1.48588	1.48588	0.240607	0.01	0.115015	0.01	1.6729	1.43047

## Sheet: log(ConvDM,2)<-1log(BBvDM,2)<-1
# Fold Change cut-off: 1.0 # P-value cut-off: 0.05 # Condition pairs: log(ConvsDM,2)>1,log(BBRvsDM,2)>1 # Column A: ProbeName it represents probe name. # Column B~D Group--averaged Raw Intensity(mean) # Column E~F Condition pairs # Column G P-value, P-value calculated from unpaired t-test. # Column H ~ U: Annotations, include GeneSymbol,GeneName,GO,Description,KEGG,PrimaryAccession,RefSeqAccessio…
	Group--Raw Intensity(mean)			Condition pairs			Annotations														Raw Intensity									Normalized Intensity
ProbeName	groupCon(mean)	group DM(mean)	groupBBR(mean)	log(ConvsDM,2)	log(BBRvsDM,2)	pvalue(ANOVA)	GeneSymbol	GeneName	GO	Description	KEGG	PrimaryAccession	RefSeqAccession	GenbankAccession	UniGeneID	EntrezGeneID	EnsemblID	TIGRID	GenomicCoordinates	Cytoband	group Con/G1G2	group Con/G3G4	group Con/G5G6	group DM/G7G8	group DM/G11G44	group DM/G9G10	group Ber/G41G42	group Ber/G37G38	group Ber/G39G40	group Con/G1G2_NormSignal	group Con/G3G4_NormSignal	group Con/G5G6_NormSignal	group DM/G7G8_NormSignal	group DM/G11G44_NormSignal	group DM/G9G10_NormSignal	group Ber/G41G42_NormSignal	group Ber/G37G38_NormSignal	group Ber/G39G40_NormSignal
A_64_P152747	4.58631	76.8186	31.7051	-4.06605	-1.27674	3.51596e-05	Mapk4	mitogen-activated protein kinase 4	GO:0004707(MAP kinase activity)|GO:0005524(ATP binding)|GO:0005634(nucleus)|GO:0005737(cytoplasm)|GO:0007049(cell cycle)|GO:0019901(protein kinase binding)|GO:0042803(protein homodimerization activity)|GO:0046982(protein heterodimerization activity)	Rattus norvegicus mitogen-activated protein kinase 4 (Mapk4), mRNA [NM_019319]		NM_019319	NM_019319	NM_019319	Rn.11731	54268	ENSRNOT00000047271	TC601109	chr18:70708299-70708240	rn|18q12.2	5.30935	4.2248	4.2248	57.9638	99.3441	73.1479	24.7929	25.1762	45.1462	2.40854	2.07888	2.07888	5.85708	6.63436	6.19274	4.63186	4.65399	5.49653
A_64_P165641	1.22222	7.50839	3.20904	-2.619	-1.22636	9.03269e-05	Olr1543	olfactory receptor 1543	GO:0004930(G-protein coupled receptor activity)|GO:0004984(olfactory receptor activity)|GO:0005886(plasma membrane)|GO:0007186(G-protein coupled receptor signaling pathway)|GO:0016021(integral to membrane)|GO:0050911(detection of chemical stimulus involved in sensory perception of smell)	Rattus norvegicus olfactory receptor 1543 (Olr1543), mRNA [NM_001001104]		NM_001001104	NM_001001104	NM_001001104	Rn.142265	406000	ENSRNOT00000051112		chr11:42097270-42097329	rn|11q12	1.65274	1.00696	1.00696	7.44476	8.79617	6.28425	2.9199	3.18855	3.51865	0.72486	0.01	0.01	2.89623	3.13687	2.65174	1.54592	1.6729	1.81502
A_44_P500949	2.66145	7.14658	2.9346	-1.42504	-1.28409	0.000315615	Gpx3	glutathione peroxidase 3	GO:0002238(response to molecule of fungal origin)|GO:0004602(glutathione peroxidase activity)|GO:0005615(extracellular space)|GO:0006749(glutathione metabolic process)|GO:0006979(response to oxidative stress)|GO:0007565(female pregnancy)|GO:0008430(selenium binding)|GO:0010033(response to organic substance)|GO:0010269(response to selenium ion)|GO:0014070(response to organic cyclic compound)|GO:00…	Rattus norvegicus glutathione peroxidase 3 (Gpx3), mRNA [NM_022525]	00480:Glutathione metabolism|00590:Arachidonic acid metabolism	NM_022525	NM_022525	NM_022525	Rn.108074	64317		TC601941	chr10:40316128-40317595	rn|10q22	2.38259	2.80088	2.80088	5.66716	7.04495	8.72761	2.9199	3.18855	2.69535	1.25253	1.48588	1.48588	2.50263	2.81659	3.12559	1.54592	1.6729	1.43047
A_64_P146388	1.4655	10.1624	4.25569	-2.79377	-1.25577	0.000862249	Gfra2	GDNF family receptor alpha 2	GO:0007169(transmembrane receptor protein tyrosine kinase signaling pathway)|GO:0007399(nervous system development)|GO:0016167(glial cell-derived neurotrophic factor receptor activity)|GO:0031953(negative regulation of protein autophosphorylation)	Rattus norvegicus GDNF family receptor alpha 2 (Gfra2), mRNA [NM_012750]		NM_012750	NM_012750	NM_012750	Rn.90137	25136	ENSRNOT00000019222	TC575005	chr15:51313962-51314021	rn|15p11	2.38259	1.00696	1.00696	11.9086	9.44647	9.13202	4.5083	3.18855	5.07022	1.25253	0.01	0.01	3.57393	3.23977	3.19093	2.17258	1.6729	2.34205
A_44_P483197	1.00696	6.6215	3.20904	-2.71716	-1.04502	0.00369596	Arid3b	AT rich interactive domain 3B (Bright like)	GO:0003677(DNA binding)|GO:0005622(intracellular)	Rattus norvegicus AT rich interactive domain 3B (Bright like) (Arid3b), mRNA [NM_001109001]		NM_001109001	NM_001109001	NM_001109001	Rn.18259	367092	ENSRNOT00000068340		chr8:61567289-61567230	rn|8q24	1.00696	1.00696	1.00696	2.75636	8.79617	8.31197	2.9199	3.18855	3.51865	0.01	0.01	0.01	1.46276	3.13687	3.05519	1.54592	1.6729	1.81502
A_44_P1040187	1.64781	20.8697	6.22452	-3.66279	-1.74537	0.00516899	Mri1	methylthioribose-1-phosphate isomerase homolog (S. cerevisiae)	GO:0005634(nucleus)|GO:0005737(cytoplasm)|GO:0019509(L-methionine salvage from methylthioadenosine)|GO:0042802(identical protein binding)|GO:0046523(S-methyl-5-thioribose-1-phosphate isomerase activity)	Rattus norvegicus methylthioribose-1-phosphate isomerase homolog (S. cerevisiae) (Mri1), mRNA [NM_001010947]	00270:Cysteine and methionine metabolism|01100:Metabolic pathways	NM_001010947	NM_001010947	NM_001010947	Rn.16390	288912	ENSRNOT00000003762	TC579348	chr19:25594821-25596916	rn|19q11	2.92951	1.00696	1.00696	25.1342	9.44647	28.0284	6.03855	3.18855	9.44647	1.55066	0.01	0.01	4.65158	3.23977	4.80882	2.5942	1.6729	3.23977
A_44_P358384	1.81337	33.268	15.6558	-4.19739	-1.08744	0.00550822	Dlat	dihydrolipoamide S-acetyltransferase	GO:0000166(nucleotide binding)|GO:0004742(dihydrolipoyllysine-residue acetyltransferase activity)|GO:0005739(mitochondrion)|GO:0005759(mitochondrial matrix)|GO:0006086(acetyl-CoA biosynthetic process from pyruvate)|GO:0006096(glycolysis)|GO:0030431(sleep)|GO:0045254(pyruvate dehydrogenase complex)	Rattus norvegicus dihydrolipoamide S-acetyltransferase (Dlat), nuclear gene encoding mitochondrial protein, mRNA [NM_031025]	00010:Glycolysis / Gluconeogenesis|00020:Citrate cycle (TCA cycle)|00620:Pyruvate metabolism|01100:Metabolic pathways	NM_031025	NM_031025	NM_031025	Rn.15413	81654	ENSRNOT00000023010	TC575280	chr8:53991327-53991268	rn|8q23	2.38259	1.52875	1.52875	44.4896	31.0498	24.2645	22.5001	3.18855	21.2787	1.25253	0.612357	0.612357	5.4754	4.95651	4.60077	4.49186	1.6729	4.41134
A_64_P120808	2.84375	6.90726	2.9346	-1.28032	-1.23495	0.00595606	Krt80	keratin 80	GO:0005198(structural molecule activity)|GO:0045095(keratin filament)	Rattus norvegicus keratin 80 (Krt80), mRNA [NM_001008815]		NM_001008815	NM_001008815	NM_001008815	Rn.103689	315318	ENSRNOT00000029697	TC621490	chr7:140096176-140096117	rn|7q36	2.92951	2.80088	2.80088	5.66716	10.0949	4.95977	2.9199	3.18855	2.69535	1.55066	1.48588	1.48588	2.50263	3.33555	2.31027	1.54592	1.6729	1.43047
A_64_P112291	9.16729	37.2864	14.4458	-2.02408	-1.368	0.00676689	Slc1a7	solute carrier family 1 (glutamate transporter), member 7	GO:0016020(membrane)|GO:0017153(sodium:dicarboxylate symporter activity)	Rattus norvegicus solute carrier family 1 (glutamate transporter), member 7 (Slc1a7), mRNA [NM_001108973]		NM_001108973	NM_001108973	NM_001108973	Rn.225093	366432	ENSRNOT00000016557		chr5:129117905-129117964	rn|5q35	10.1438	8.67903	8.67903	26.7549	46.3843	38.7201	11.7596	23.2552	8.32253	3.34253	3.11753	3.11753	4.74173	5.53557	5.27501	3.55576	4.53948	3.05702
A_64_P116606	1.57008	6.44956	1.73415	-2.03836	-1.89497	0.00753954	Rcan1	regulator of calcineurin 1	GO:0005634(nucleus)|GO:0005737(cytoplasm)|GO:0007165(signal transduction)|GO:0007519(skeletal muscle tissue development)|GO:0009612(response to mechanical stimulus)|GO:0019722(calcium-mediated signaling)|GO:0030346(protein phosphatase 2B binding)|GO:0043627(response to estrogen stimulus)|GO:0043666(regulation of phosphoprotein phosphatase activity)|GO:0048741(skeletal muscle fiber development)|GO…	Rattus norvegicus regulator of calcineurin 1 (Rcan1), mRNA [NM_153724]		NM_153724	NM_153724	NM_153724	Rn.12942	266766	ENSRNOT00000002715	TC576216	chr11:32408770-32408711	rn|11q11	1.65274	1.52875	1.52875	7.97116	5.09329	6.28425	1.00696	3.18855	1.00696	0.72486	0.612357	0.612357	2.99479	2.3486	2.65174	0.01	1.6729	0.01
A_64_P082149	1.00696	15.7484	3.28706	-3.96713	-2.26034	0.00765951	Vom2r55	vomeronasal 2 receptor, 55	GO:0004930(G-protein coupled receptor activity)|GO:0005886(plasma membrane)|GO:0016021(integral to membrane)	Rattus norvegicus vomeronasal 2 receptor, 55 (Vom2r55), mRNA [NM_001099495]		NM_001099495	NM_001099495	NM_001099495	Rn.217934	691442			chr7:14663984-14664043	rn|7q11	1.00696	1.00696	1.00696	7.44476	29.4739	10.3266	5.60438	3.18855	1.06825	0.01	0.01	0.01	2.89623	4.88136	3.3683	2.48655	1.6729	0.095251
A_44_P119465	1.81337	5.34705	2.52295	-1.56007	-1.08363	0.00882018	Atp11c	ATPase, class VI, type 11C	GO:0000287(magnesium ion binding)|GO:0004012(phospholipid-translocating ATPase activity)|GO:0005524(ATP binding)|GO:0005783(endoplasmic reticulum)|GO:0005886(plasma membrane)|GO:0006812(cation transport)|GO:0015662(ATPase activity, coupled to transmembrane movement of ions, phosphorylative mechanism)|GO:0016021(integral to membrane)	Uncharacterized protein [Source:UniProtKB/TrEMBL;Acc:D3Z9J3] [ENSRNOT00000049120]		ENSRNOT00000049120	XM_002727689	XM_002727689	Rn.105357	317599	ENSRNOT00000049120	TC622586	chrX:145756686-145756627	rn|Xq36	2.38259	1.52875	1.52875	4.48789	7.04495	4.5083	1.68496	3.18855	2.69535	1.25253	0.612357	0.612357	2.16604	2.81659	2.17258	0.752715	1.6729	1.43047
A_43_P11601	5.92298	16.4243	4.45069	-1.47144	-1.88374	0.0111733	Sod3	superoxide dismutase 3, extracellular	GO:0000303(response to superoxide)|GO:0001666(response to hypoxia)|GO:0004784(superoxide dismutase activity)|GO:0005507(copper ion binding)|GO:0005615(extracellular space)|GO:0005634(nucleus)|GO:0005737(cytoplasm)|GO:0005739(mitochondrion)|GO:0005802(trans-Golgi network)|GO:0005829(cytosol)|GO:0006950(response to stress)|GO:0008270(zinc ion binding)|GO:0019430(removal of superoxide radicals)|GO:0…	Rattus norvegicus superoxide dismutase 3, extracellular (Sod3), mRNA [NM_012880]		NM_012880	NM_012880	NM_012880	Rn.10358	25352	ENSRNOT00000005155	TC639821	chr14:63381525-63381466	rn|14q11	7.58236	5.09329	5.09329	9.18072	24.5547	15.5376	5.09329	3.18855	5.07022	2.92265	2.3486	2.3486	3.19861	4.61793	3.95769	2.3486	1.6729	2.34205
A_43_P13040	1326.9	4772.07	1551.8	-1.84656	-1.62067	0.0114213	Rhoa	ras homolog family member A	GO:0000902(cell morphogenesis)|GO:0001666(response to hypoxia)|GO:0003924(GTPase activity)|GO:0004871(signal transducer activity)|GO:0005515(protein binding)|GO:0005525(GTP binding)|GO:0005634(nucleus)|GO:0005737(cytoplasm)|GO:0005739(mitochondrion)|GO:0005829(cytosol)|GO:0005856(cytoskeleton)|GO:0005886(plasma membrane)|GO:0005938(cell cortex)|GO:0006184(GTP catabolic process)|GO:0006357(regulat…	Rattus norvegicus ras homolog family member A (Rhoa), mRNA [NM_057132]		NM_057132	NM_057132	NM_057132	Rn.107401	117273	ENSRNOT00000071664	TC583419	chr16_random:1043046-1043105	04062:Chemokine signaling pathway|04144:Endocytosis|04270:Vascular smooth muscle contraction|04310:Wnt signaling pathway|04350:TGF-beta signaling pathway|04360:Axon guidance|04510:Focal adhesion|04520:Adherens junction|04530:Tight junction|04660:T cell receptor signaling pathway|04670:Leukocyte transendothelial migration|04722:Neurotrophin signaling pathway|04810:Regulation of actin cytoskeleton|…	689.627	1645.54	1645.54	4076.13	4631.91	5608.17	1736.78	891.679	2026.95	9.42967	10.6843	10.6843	11.993	12.1774	12.4533	10.7622	9.80038	10.9851
A_64_P010887	1.00696	4.12731	1.73415	-2.0352	-1.25097	0.0122102	Sat1	spermidine/spermine N1-acetyl transferase 1	GO:0001525(angiogenesis)|GO:0005622(intracellular)|GO:0006595(polyamine metabolic process)|GO:0008080(N-acetyltransferase activity)|GO:0019809(spermidine binding)|GO:0042127(regulation of cell proliferation)	Rattus norvegicus spermidine/spermine N1-acetyl transferase 1 (Sat1), mRNA [NM_001007667]	00330:Arginine and proline metabolism|01100:Metabolic pathways	NM_001007667	NM_001007667	NM_001007667	Rn.107986	302642	ENSRNOT00000068078	NP831192	chrX:61637834-61637893	rn|Xq22	1.00696	1.00696	1.00696	4.48789	3.38574	4.5083	1.00696	3.18855	1.00696	0.01	0.01	0.01	2.16604	1.75947	2.17258	0.01	1.6729	0.01
A_64_P018876	1.00696	4.09056	1.96016	-2.0223	-1.06133	0.0125649	Xlr3a	X-linked lymphocyte-regulated 3A		PREDICTED: Rattus norvegicus X-linked lymphocyte-regulated 3A (Xlr3a), mRNA [XM_001073004]		XM_001073004	XM_001073004	XM_001073004		690041			chrX:159055232-159055173	rn|Xq37	1.00696	1.00696	1.00696	5.66716	3.38574	3.21877	1.68496	3.18855	1.00696	0.01	0.01	0.01	2.50263	1.75947	1.68651	0.752715	1.6729	0.01
A_44_P440302	1.00696	4.26665	1.73415	-2.0831	-1.29887	0.0126654	Olr629	olfactory receptor 629	GO:0004930(G-protein coupled receptor activity)|GO:0004984(olfactory receptor activity)|GO:0005886(plasma membrane)|GO:0007186(G-protein coupled receptor signaling pathway)|GO:0016021(integral to membrane)|GO:0050911(detection of chemical stimulus involved in sensory perception of smell)	Rattus norvegicus olfactory receptor 629 (Olr629), mRNA [NM_001001058]	04740:Olfactory transduction	NM_001001058	NM_001001058	NM_001001058	Rn.142863	405946	ENSRNOT00000044692		chr3:72306305-72306246	rn|3q24	1.00696	1.00696	1.00696	4.48789	5.09329	3.21877	1.00696	3.18855	1.00696	0.01	0.01	0.01	2.16604	2.3486	1.68651	0.01	1.6729	0.01
A_42_P555365	2.46284	5.79811	1.98059	-1.23526	-1.54966	0.0136469	Slc17a3	solute carrier family 17 (sodium phosphate), member 3	GO:0005436(sodium:phosphate symporter activity)|GO:0005737(cytoplasm)|GO:0005789(endoplasmic reticulum membrane)|GO:0005887(integral to plasma membrane)|GO:0006814(sodium ion transport)|GO:0006817(phosphate ion transport)|GO:0006855(drug transmembrane transport)|GO:0008308(voltage-gated anion channel activity)|GO:0008514(organic anion transmembrane transporter activity)|GO:0015143(urate transmemb…	Rattus norvegicus solute carrier family 17 (sodium phosphate), member 3 (Slc17a3), mRNA [NM_153622]		NM_153622	NM_153622	NM_153622	Rn.16357	266730	ENSRNOT00000029626	NP646404	chr17:48619810-48619869	rn|17p11	2.92951	2.2295	2.2295	6.6437	5.09329	5.65736	1.68496	3.18855	1.06825	1.55066	1.15672	1.15672	2.73199	2.3486	2.50013	0.752715	1.6729	0.095251
A_64_P062842	3.99111	8.08188	3.9335	-1.0179	-1.03888	0.013777	Rpl3	ribosomal protein L3	GO:0003735(structural constituent of ribosome)|GO:0005730(nucleolus)|GO:0005737(cytoplasm)|GO:0005840(ribosome)|GO:0006412(translation)|GO:0022625(cytosolic large ribosomal subunit)|GO:0071353(cellular response to interleukin-4)	Rattus norvegicus ribosomal protein L3 (Rpl3), mRNA [NM_198753]	03010:Ribosome	NM_198753	NM_198753	NM_198753	Rn.107726	300079	ENSRNOT00000067032	TC628620	chr7:118314845-118314786	rn|7q34	3.52374	4.2248	4.2248	5.66716	9.44647	9.13202	5.09329	3.18855	3.51865	1.81711	2.07888	2.07888	2.50263	3.23977	3.19093	2.3486	1.6729	1.81502
A_64_P052835	1.22222	5.73133	2.01362	-2.22937	-1.50908	0.0138093	Il16	interleukin 16	GO:0003674(molecular_function)|GO:0005125(cytokine activity)|GO:0005575(cellular_component)|GO:0005622(intracellular)|GO:0005634(nucleus)|GO:0005737(cytoplasm)|GO:0005886(plasma membrane)|GO:0008150(biological_process)|GO:0030595(leukocyte chemotaxis)|GO:0050930(induction of positive chemotaxis)	Rattus norvegicus interleukin 16 (Il16), mRNA [NM_001105749]		NM_001105749	NM_001105749	NM_001105749	Rn.104665	116996	ENSRNOT00000016289	TC602377	chr1:139908328-139908269	rn|1q31	1.65274	1.00696	1.00696	3.38574	7.04495	6.76328	1.00696	3.18855	1.84536	0.72486	0.01	0.01	1.75947	2.81659	2.75772	0.01	1.6729	0.883901
A_44_P189859	2.2029	9.42318	3.53517	-2.09681	-1.41444	0.0146773	Zbtb43	zinc finger and BTB domain containing 43	GO:0003676(nucleic acid binding)|GO:0005634(nucleus)|GO:0008270(zinc ion binding)|GO:0046872(metal ion binding)	Rattus norvegicus zinc finger and BTB domain containing 43 (Zbtb43), mRNA [NM_001012094]		NM_001012094	NM_001012094	NM_001012094	Rn.7867	311872	ENSRNOT00000022814	TC577608	chr3:12457718-12457659	rn|3p11	1.00696	2.80088	2.80088	6.6437	11.5725	10.0533	2.34673	3.18855	5.07022	0.01	1.48588	1.48588	2.73199	3.53263	3.3296	1.23065	1.6729	2.34205
A_43_P23106	220.39	531.962	211.866	-1.27126	-1.32817	0.0152788	Ascc2	activating signal cointegrator 1 complex subunit 2		Rattus norvegicus activating signal cointegrator 1 complex subunit 2 (Ascc2), mRNA [NM_001109091]		NM_001109091	NM_001109091	NM_001109091	Rn.35208	498402	ENSRNOT00000065188		chr14:85310462-85310521	rn|14q21	255.446	202.862	202.862	371.831	565.999	658.055	138.742	186.459	310.396	7.99687	7.66435	7.66435	8.5385	9.14466	9.36206	7.11626	7.54272	8.27797
A_64_P077950	1.4655	19.9907	8.39636	-3.76987	-1.25149	0.0153246	RGD1562673	similar to Prostatic spermine-binding protein precursor (SBP)		Rattus norvegicus similar to Prostatic spermine-binding protein precursor (SBP) (RGD1562673), mRNA [NM_001108823]		NM_001108823	NM_001108823	NM_001108823	Rn.111120	363551			chr10:13199811-13199752	rn|10q12	2.38259	1.00696	1.00696	5.66716	31.0498	23.2552	10.6314	3.18855	11.3691	1.25253	0.01	0.01	2.50263	4.95651	4.53948	3.41026	1.6729	3.50705
A_64_P116495	1.22222	6.08149	2.18074	-2.31493	-1.4796	0.0158533	LOC100188936	hypothetical protein LOC100188936	GO:0005789(endoplasmic reticulum membrane)|GO:0006672(ceramide metabolic process)|GO:0016021(integral to membrane)	Rattus norvegicus hypothetical protein LOC100188936 (LOC100188936), mRNA [NM_001134704]		NM_001134704	NM_001134704	NM_001134704	Rn.121001	100188936		TC586550	chr9:45192540-45192481	rn|9q22	1.65274	1.00696	1.00696	7.44476	3.38574	7.41398	2.34673	3.18855	1.00696	0.72486	0.01	0.01	2.89623	1.75947	2.89025	1.23065	1.6729	0.01
A_64_P154292	2.1449	10.5412	2.23962	-2.29706	-2.23471	0.0164458	Hnrnpa3	heterogeneous nuclear ribonucleoprotein A3	GO:0000166(nucleotide binding)|GO:0003729(mRNA binding)|GO:0005634(nucleus)|GO:0005681(spliceosomal complex)|GO:0005730(nucleolus)|GO:0005737(cytoplasm)|GO:0006397(mRNA processing)|GO:0008380(RNA splicing)|GO:0035770(ribonucleoprotein granule)|GO:0043005(neuron projection)|GO:0051028(mRNA transport)|GO:0051033(RNA transmembrane transporter activity)|GO:0071013(catalytic step 2 spliceosome)	Rattus norvegicus heterogeneous nuclear ribonucleoprotein A3 (Hnrnpa3), transcript variant 1, mRNA [NM_001111294]	03040:Spliceosome	NM_001111294	NM_001111294	NM_001111294	Rn.107690	362152		TC575300	chr3:58360834-58360893	rn|3q23	4.42078	1.00696	1.00696	9.18072	15.0289	7.41398	1.68496	3.18855	1.84536	2.1443	0.01	0.01	3.19861	3.90967	2.89025	0.752715	1.6729	0.883901
A_64_P391801	12.7247	30.7115	8.40776	-1.27115	-1.86898	0.016885	Srsf7	serine/arginine-rich splicing factor 7	GO:0005634(nucleus)|GO:0005730(nucleolus)|GO:0048025(negative regulation of nuclear mRNA splicing, via spliceosome)	Rattus norvegicus serine/arginine-rich splicing factor 7 (Srsf7), mRNA [NM_001039035]	03040:Spliceosome	NM_001039035	NM_001039035	NM_001039035	Rn.218757	362687	ENSRNOT00000038448	TC579393	chr6:3099576-3098739	rn|6q11	15.0289	11.5725	11.5725	32.165	27.9392	32.0303	10.0742	3.18855	11.9606	3.90967	3.53263	3.53263	5.00742	4.80422	5.00136	3.33259	1.6729	3.58022
A_64_P043702	1.00696	3.91673	1.75459	-1.95965	-1.15852	0.0190373	Oit3	oncoprotein induced transcript 3	GO:0005515(protein binding)|GO:0005635(nuclear envelope)	Rattus norvegicus oncoprotein induced transcript 3 (Oit3), mRNA [NM_001001507]		NM_001001507	NM_001001507	NM_001001507	Rn.109174	294559	ENSRNOT00000075682	TC575833	chrUn:15035859-15035918		1.00696	1.00696	1.00696	4.48789	4.56695	2.69535	1.00696	3.18855	1.06825	0.01	0.01	0.01	2.16604	2.19123	1.43047	0.01	1.6729	0.095251
A_64_P133217	6.42857	21.7578	5.64239	-1.75897	-1.94716	0.0202867	Ubr7	ubiquitin protein ligase E3 component n-recognin 7 (putative)	GO:0003674(molecular_function)|GO:0004842(ubiquitin-protein ligase activity)|GO:0005575(cellular_component)|GO:0008150(biological_process)|GO:0008270(zinc ion binding)|GO:0046872(metal ion binding)	Rattus norvegicus ubiquitin protein ligase E3 component n-recognin 7 (putative) (Ubr7), mRNA [NM_001007705]		NM_001007705	NM_001007705	NM_001007705	Rn.7690	314399	ENSRNOT00000010739	TC574505	chr6:127051401-127051460	rn|6q32	5.9983	6.6437	6.6437	9.95921	31.0498	24.2645	6.7228	3.18855	7.01582	2.58455	2.73199	2.73199	3.31603	4.95651	4.60077	2.74906	1.6729	2.81061
A_44_P520036	1.82199	7.85543	2.29695	-2.10818	-1.77397	0.020456	Olr916	olfactory receptor 916	GO:0004930(G-protein coupled receptor activity)|GO:0004984(olfactory receptor activity)|GO:0005886(plasma membrane)|GO:0007186(G-protein coupled receptor signaling pathway)|GO:0016021(integral to membrane)|GO:0050911(detection of chemical stimulus involved in sensory perception of smell)	Rattus norvegicus olfactory receptor 916 (Olr916), mRNA [NM_001000587]	04740:Olfactory transduction	NM_001000587	NM_001000587	NM_001000587	Rn.143392	366797	ENSRNOT00000043635		chr7:3938321-3938262	rn|7q11	1.00696	2.2295	2.2295	8.51168	10.0949	4.95977	1.00696	3.18855	2.69535	0.01	1.15672	1.15672	3.08944	3.33555	2.31027	0.01	1.6729	1.43047
A_64_P047688	17.3821	37.1726	7.92354	-1.09663	-2.23002	0.0209577	Igbp1	immunoglobulin (CD79A) binding protein 1	GO:0000122(negative regulation of transcription from RNA polymerase II promoter)|GO:0005737(cytoplasm)|GO:0008601(protein phosphatase type 2A regulator activity)|GO:0009966(regulation of signal transduction)|GO:0031434(mitogen-activated protein kinase kinase binding)|GO:0032873(negative regulation of stress-activated MAPK cascade)|GO:0034612(response to tumor necrosis factor)|GO:0035306(positive …	Rattus norvegicus immunoglobulin (CD79A) binding protein 1 (Igbp1), mRNA [NM_031624]		NM_031624	NM_031624	NM_031624	Rn.7079	58845	ENSRNOT00000057900	TC578937	chrX:88506620-88506679	rn|Xq31	29.0014	11.5725	11.5725	29.0852	44.7224	37.7101	11.1356	3.18855	9.44647	4.85805	3.53263	3.53263	4.86221	5.48293	5.23688	3.47711	1.6729	3.23977
A_64_P085341	2.46284	21.092	4.76951	-3.0983	-2.14478	0.0221277	Gas2l1	growth arrest-specific 2 like 1	GO:0007050(cell cycle arrest)	Rattus norvegicus growth arrest-specific 2 like 1 (Gas2l1), mRNA [NM_001108365]		NM_001108365	NM_001108365	NM_001108365	Rn.22169	360973	ENSRNOT00000065135		chr14:85716676-85716617	rn|14q21	2.92951	2.2295	2.2295	5.66716	36.1375	21.4712	4.10415	3.18855	7.01582	1.55066	1.15672	1.15672	2.50263	5.17542	4.42433	2.03708	1.6729	2.81061
A_43_P13170	10.5898	42.409	14.2614	-2.00169	-1.57226	0.022374	Tmlhe	trimethyllysine hydroxylase, epsilon	GO:0005506(iron ion binding)|GO:0005739(mitochondrion)|GO:0005759(mitochondrial matrix)|GO:0016702(oxidoreductase activity, acting on single donors with incorporation of molecular oxygen, incorporation of two atoms of oxygen)|GO:0031418(L-ascorbic acid binding)|GO:0045329(carnitine biosynthetic process)|GO:0050353(trimethyllysine dioxygenase activity)|GO:0051354(negative regulation of oxidoreduct…	Rattus norvegicus trimethyllysine hydroxylase, epsilon (Tmlhe), nuclear gene encoding mitochondrial protein, mRNA [NM_133387]	00310:Lysine degradation	NM_133387	NM_133387	NM_133387	Rn.3607	170898	ENSRNOT00000049573	TC640602	chr20:55975-56034	rn|20p12	11.6211	10.0742	10.0742	22.4824	62.7426	42.0019	11.7596	23.2552	7.76939	3.53868	3.33259	3.33259	4.49073	5.97137	5.39238	3.55576	4.53948	2.9578
A_44_P121167	4.81596	13.5162	2.74354	-1.48879	-2.30057	0.022832	Marcks	myristoylated alanine rich protein kinase C substrate	GO:0003779(actin binding)|GO:0005080(protein kinase C binding)|GO:0005516(calmodulin binding)|GO:0005737(cytoplasm)|GO:0005813(centrosome)|GO:0005938(cell cortex)|GO:0016020(membrane)|GO:0042585(germinal vesicle)	Rattus norvegicus myristoylated alanine rich protein kinase C substrate (Marcks), mRNA [NM_001271090]	04666:Fc gamma R-mediated phagocytosis	NM_001271090	NM_001271090	NM_001271090	Rn.9560	25603	ENSRNOT00000000707	TC626164	chr20:41306594-41306535	rn|20q12	5.9983	4.2248	4.2248	5.66716	24.5547	10.3266	2.34673	3.18855	2.69535	2.58455	2.07888	2.07888	2.50263	4.61793	3.3683	1.23065	1.6729	1.43047
A_42_P512460	2.95993	6.2564	2.65127	-1.07977	-1.23865	0.0248857	Aimp2	aminoacyl tRNA synthetase complex-interacting multifunctional protein 2	GO:0005634(nucleus)|GO:0005829(cytosol)|GO:0006412(translation)|GO:0006915(apoptotic process)|GO:0008285(negative regulation of cell proliferation)|GO:0031398(positive regulation of protein ubiquitination)|GO:0060510(Type II pneumocyte differentiation)	Rattus norvegicus aminoacyl tRNA synthetase complex-interacting multifunctional protein 2 (Aimp2), mRNA [NM_001037348]		NM_001037348	NM_001037348	NM_001037348	Rn.162097	288480	ENSRNOT00000001379	TC579687	chr12:11038011-11038070	rn|12p11	4.42078	2.2295	2.2295	7.44476	6.36468	4.95977	2.9199	3.18855	1.84536	2.1443	1.15672	1.15672	2.89623	2.67009	2.31027	1.54592	1.6729	0.883901
A_43_P11437	5.16531	10.5486	4.23348	-1.03013	-1.31714	0.0272322	Asgr1	asialoglycoprotein receptor 1	GO:0004873(asialoglycoprotein receptor activity)|GO:0016021(integral to membrane)|GO:0030246(carbohydrate binding)|GO:0031668(cellular response to extracellular stimulus)|GO:0042803(protein homodimerization activity)|GO:0046872(metal ion binding)	Rattus norvegicus asialoglycoprotein receptor 1 (Asgr1), mRNA [NM_012503]		NM_012503	NM_012503	NM_012503	Rn.44300	24210	ENSRNOT00000025254	TC639040	chr10:56902589-56902782	rn|10q24	5.30935	5.09329	5.09329	6.6437	10.0949	14.9073	3.51358	3.18855	5.9983	2.40854	2.3486	2.3486	2.73199	3.33555	3.89795	1.81294	1.6729	2.58455
A_44_P111337	4.86912	22.0847	3.97415	-2.18132	-2.47433	0.0274424	Traf3	Tnf receptor-associated factor 3	GO:0001817(regulation of cytokine production)|GO:0002224(toll-like receptor signaling pathway)|GO:0003674(molecular_function)|GO:0004842(ubiquitin-protein ligase activity)|GO:0005575(cellular_component)|GO:0007165(signal transduction)|GO:0008150(biological_process)|GO:0008270(zinc ion binding)|GO:0009898(internal side of plasma membrane)|GO:0019901(protein kinase binding)|GO:0030162(regulation of…	Rattus norvegicus Tnf receptor-associated factor 3 (Traf3), mRNA [NM_001108724]	04620:Toll-like receptor signaling pathway|04622:RIG-I-like receptor signaling pathway|05160:Hepatitis C|05200:Pathways in cancer|05222:Small cell lung cancer	NM_001108724	NM_001108724	NM_001108724	Rn.12033	362788		TC592430	chr6:136026758-136026817	rn|6q32	4.42078	5.09329	5.09329	9.95921	44.7224	11.5725	6.03855	3.18855	2.69535	2.1443	2.3486	2.3486	3.31603	5.48293	3.53263	2.5942	1.6729	1.43047
A_64_P131515	1.99567	5.24007	2.01362	-1.39271	-1.37979	0.02918	Defa7	defensin alpha 7		Rattus norvegicus defensin alpha 7 (Defa7), mRNA [NM_001033075]		NM_001033075	NM_001033075	NM_001033075	Rn.160895	613222	ENSRNOT00000029297	TC629658	chr16:75101568-75101509	rn|16q12.5	2.92951	1.52875	1.52875	5.66716	5.09329	4.95977	1.00696	3.18855	1.84536	1.55066	0.612357	0.612357	2.50263	2.3486	2.31027	0.01	1.6729	0.883901
A_64_P022205	5.45103	17.3782	6.46002	-1.67268	-1.42767	0.0294858	RGD1562543	similar to ribosomal protein L27a		PREDICTED: Rattus norvegicus 60S ribosomal protein L27a-like (RGD1562543), misc_RNA [XR_145728]		XR_145728	XR_145728	XR_145728	Rn.195717	308719			chr1:15181841-15181836	rn|1p12	4.42078	5.96616	5.96616	25.1342	16.3128	10.6876	7.36992	3.18855	8.8216	2.1443	2.5768	2.5768	4.65158	4.02793	3.41787	2.88165	1.6729	3.14104
A_64_P004386	2.28053	16.5077	4.87151	-2.8557	-1.7607	0.0307046	Cyb5r4	cytochrome b5 reductase 4	GO:0003958(NADPH-hemoprotein reductase activity)|GO:0004128(cytochrome-b5 reductase activity)|GO:0005575(cellular_component)|GO:0005783(endoplasmic reticulum)|GO:0006091(generation of precursor metabolites and energy)|GO:0006739(NADP metabolic process)|GO:0006801(superoxide metabolic process)|GO:0016174(NAD(P)H oxidase activity)|GO:0016491(oxidoreductase activity)|GO:0016653(oxidoreductase activi…	Rattus norvegicus cytochrome b5 reductase 4 (Cyb5r4), mRNA [NM_133427]		NM_133427	NM_133427	NM_133427	Rn.3334	171015	ENSRNOT00000013908	TC636738	chr8:92343428-92343487	rn|8q31	2.38259	2.2295	2.2295	5.66716	32.734	11.122	7.90733	3.18855	3.51865	1.25253	1.15672	1.15672	2.50263	5.03272	3.47535	2.98319	1.6729	1.81502
A_64_P035026	1.84588	12.0952	4.45069	-2.71206	-1.44234	0.0310869	Wars2	tryptophanyl tRNA synthetase 2 (mitochondrial)	GO:0001570(vasculogenesis)|GO:0004830(tryptophan-tRNA ligase activity)|GO:0005524(ATP binding)|GO:0005739(mitochondrion)|GO:0006436(tryptophanyl-tRNA aminoacylation)	Rattus norvegicus tryptophanyl tRNA synthetase 2 (mitochondrial) (Wars2), nuclear gene encoding mitochondrial protein, mRNA [NM_001168641]	00380:Tryptophan metabolism|00970:Aminoacyl-tRNA biosynthesis	NM_001168641	NM_001168641	NM_001168641	Rn.204847	690654	ENSRNOT00000026458	TC613488	chr2:193902362-193902421	rn|2q34	3.52374	1.00696	1.00696	4.48789	21.4712	10.3266	5.09329	3.18855	5.07022	1.81711	0.01	0.01	2.16604	4.42433	3.3683	2.3486	1.6729	2.34205
A_64_P351512	8.47204	18.004	4.47667	-1.08754	-2.00782	0.0325014	Btnl8	butyrophilin-like 8	GO:0016021(integral to membrane)|GO:0050776(regulation of immune response)	Rattus norvegicus butyrophilin-like 8 (Btnl8), mRNA [NM_212489]		NM_212489	NM_212489	NM_212489	Rn.225191	406160	ENSRNOT00000041348	TC577291	chr20:4405380-4405439	rn|20p12	9.22351	8.0963	8.0963	10.5904	32.734	10.6876	6.7228	3.18855	3.51865	3.20532	3.01726	3.01726	3.40468	5.03272	3.41787	2.74906	1.6729	1.81502
A_44_P398592	2.46284	5.03963	1.96016	-1.033	-1.36235	0.0374573	Loh12cr1	loss of heterozygosity, 12, chromosomal region 1		Rattus norvegicus loss of heterozygosity, 12, chromosomal region 1 (Loh12cr1), mRNA [NM_001108650]		NM_001108650	NM_001108650	NM_001108650	Rn.61437	362452	ENSRNOT00000008645	TC603983	chr4:171613209-171613268	rn|4q43	2.92951	2.2295	2.2295	5.66716	5.76148	3.69024	1.68496	3.18855	1.00696	1.55066	1.15672	1.15672	2.50263	2.52644	1.88371	0.752715	1.6729	0.01
A_44_P318323	1.00696	4.2305	1.73415	-2.07083	-1.2866	0.0389295	Ugt2b7	UDP glucuronosyltransferase 2 family, polypeptide B7	GO:0001972(retinoic acid binding)|GO:0003674(molecular_function)|GO:0005575(cellular_component)|GO:0005789(endoplasmic reticulum membrane)|GO:0008150(biological_process)|GO:0008209(androgen metabolic process)|GO:0015020(glucuronosyltransferase activity)|GO:0016021(integral to membrane)|GO:0016758(transferase activity, transferring hexosyl groups)|GO:0052695(cellular glucuronidation)	Rattus norvegicus UDP glucuronosyltransferase 2 family, polypeptide B7 (Ugt2b7), mRNA [NM_173323]		NM_173323	NM_173323	NM_173323	Rn.11131	286989		TC576720	chr14:22522550-22522609	rn|14p21	1.00696	1.00696	1.00696	2.16607	6.36468	4.16076	1.00696	3.18855	1.00696	0.01	0.01	0.01	1.11508	2.67009	2.05685	0.01	1.6729	0.01
A_64_P028988	2.79157	7.28056	2.18074	-1.38297	-1.73923	0.0393453	Olr251	olfactory receptor 251	GO:0004930(G-protein coupled receptor activity)|GO:0004984(olfactory receptor activity)|GO:0005886(plasma membrane)|GO:0007186(G-protein coupled receptor signaling pathway)|GO:0016021(integral to membrane)|GO:0050911(detection of chemical stimulus involved in sensory perception of smell)	Rattus norvegicus olfactory receptor 251 (Olr251), mRNA [NM_001000218]	04740:Olfactory transduction	NM_001000218	NM_001000218	NM_001000218	Rn.144796	293394	ENSRNOT00000040363	NP1479389	chr1:165563331-165563272	rn|1q33	1.65274	3.36098	3.36098	4.48789	9.44647	7.90733	2.34673	3.18855	1.00696	0.72486	1.74888	1.74888	2.16604	3.23977	2.98319	1.23065	1.6729	0.01
A_64_P071725	3.41622	20.537	5.64239	-2.58775	-1.86385	0.0401238	Cd101	CD101 molecule		Rattus norvegicus CD101 molecule (Cd101), mRNA [NM_001271217]		NM_001271217	NM_001271217	NM_001271217	Rn.229951	310727	ENSRNOT00000056140		chr2:196044386-196044327	rn|2q34	7.19116	1.52875	1.52875	7.97116	24.5547	29.0852	6.7228	3.18855	7.01582	2.84622	0.612357	0.612357	2.99479	4.61793	4.86221	2.74906	1.6729	2.81061
A_64_P030684	8.31348	21.9828	5.38726	-1.40285	-2.02875	0.0409667	RGD1311344	similar to RIKEN cDNA 2810039F03	GO:0003674(molecular_function)|GO:0005575(cellular_component)|GO:0005622(intracellular)|GO:0008150(biological_process)|GO:0008270(zinc ion binding)	PREDICTED: Rattus norvegicus double zinc ribbon and ankyrin repeat-containing protein 1-like (RGD1311344), mRNA [XM_003749578]		XM_003749578	XM_003749578	XM_003749578		311486			chr3:133021920-133021912	rn|3q41	7.58236	8.67903	8.67903	9.95921	32.734	23.2552	2.9199	3.18855	10.0533	2.92265	3.11753	3.11753	3.31603	5.03272	4.53948	1.54592	1.6729	3.3296
A_64_P163277	1.4655	5.27405	1.75459	-1.84752	-1.58778	0.0420401	Tgm6	transglutaminase 6	GO:0003810(protein-glutamine gamma-glutamyltransferase activity)|GO:0018149(peptide cross-linking)|GO:0046872(metal ion binding)	Uncharacterized protein [Source:UniProtKB/TrEMBL;Acc:F1M4T7] [ENSRNOT00000009097]		ENSRNOT00000009097	XM_001079039	XM_001079039		296152	ENSRNOT00000009097		chr3:117753398-117753457	rn|3q36	2.38259	1.00696	1.00696	7.97116	4.16076	3.69024	1.00696	3.18855	1.06825	1.25253	0.01	0.01	2.99479	2.05685	1.88371	0.01	1.6729	0.095251
A_64_P141038	1.82199	30.5283	6.67278	-4.06656	-2.19379	0.0422191	Bex4	brain expressed, X-linked 4	GO:0005634(nucleus)|GO:0005737(cytoplasm)	Rattus norvegicus brain expressed, X-linked 4 (Bex4), mRNA [NM_001037554]		NM_001037554	NM_001037554	NM_001037554	Rn.9287	501624	ENSRNOT00000031636	TC585856	chrX:123443488-123443547	rn|Xq35	1.00696	2.2295	2.2295	4.48789	56.0685	31.0285	11.7596	3.18855	5.07022	0.01	1.15672	1.15672	2.16604	5.80912	4.95552	3.55576	1.6729	2.34205
A_43_P12821	11.0963	35.5095	7.0107	-1.67813	-2.34058	0.0425859	Spa17	sperm autoantigenic protein 17	GO:0001539(ciliary or flagellar motility)|GO:0005737(cytoplasm)|GO:0007165(signal transduction)|GO:0007339(binding of sperm to zona pellucida)|GO:0008603(cAMP-dependent protein kinase regulator activity)|GO:0016020(membrane)|GO:0019861(flagellum)|GO:0031514(motile cilium)|GO:0072372(primary cilium)	Rattus norvegicus sperm autoantigenic protein 17 (Spa17), mRNA [NM_053482]		NM_053482	NM_053482	NM_053482	Rn.29090	85244	ENSRNOT00000014866	TC607080	chr8:38845209-38843119	rn|8q21	10.1438	11.5725	11.5725	11.9086	48.7793	45.8406	10.0742	3.18855	7.76939	3.34253	3.53263	3.53263	3.57393	5.6082	5.51856	3.33259	1.6729	2.9578
A_44_P1045734	10.5858	37.0945	11.5138	-1.80907	-1.68784	0.042822	Stac3	SH3 and cysteine rich domain 3	GO:0005622(intracellular)|GO:0035556(intracellular signal transduction)|GO:0042802(identical protein binding)|GO:0046872(metal ion binding)	Rattus norvegicus SH3 and cysteine rich domain 3 (Stac3), mRNA [NM_001130558]		NM_001130558	NM_001130558	NM_001130558	Rn.38669	362895	ENSRNOT00000010639	TC648445	chr7:67485292-67485515	rn|7q22	9.67086	11.0433	11.0433	32.165	46.3843	32.734	10.0742	3.18855	21.2787	3.27364	3.4651	3.4651	5.00742	5.53557	5.03272	3.33259	1.6729	4.41134
A_44_P403475	9.41813	23.9615	6.60609	-1.34721	-1.85885	0.0439828	Slc43a2	solute carrier family 43, member 2	GO:0003333(amino acid transmembrane transport)|GO:0005886(plasma membrane)|GO:0015179(L-amino acid transmembrane transporter activity)|GO:0015807(L-amino acid transport)	Rattus norvegicus solute carrier family 43, member 2 (Slc43a2), mRNA [NM_001105812]		NM_001105812	NM_001105812	NM_001105812	Rn.204988	287532	ENSRNOT00000005100	TC620462	chr10:62887615-62890103	rn|10q24	8.10607	10.0742	10.0742	11.122	32.734	28.0284	10.6314	3.18855	5.9983	3.019	3.33259	3.33259	3.47535	5.03272	4.80882	3.41026	1.6729	2.58455
A_64_P082825	7.43681	15.8155	4.73931	-1.08859	-1.73859	0.0451097	Ube2v2	ubiquitin-conjugating enzyme E2 variant 2	GO:0000729(DNA double-strand break processing)|GO:0003674(molecular_function)|GO:0005634(nucleus)|GO:0010976(positive regulation of neuron projection development)|GO:0016881(acid-amino acid ligase activity)|GO:0031372(UBC13-MMS2 complex)|GO:0032436(positive regulation of proteasomal ubiquitin-dependent protein catabolic process)|GO:0042275(error-free postreplication DNA repair)|GO:0043524(negativ…	Rattus norvegicus ubiquitin-conjugating enzyme E2 variant 2 (Ube2v2), mRNA [NM_183052]		NM_183052	NM_183052	NM_183052	Rn.3933	287927	ENSRNOT00000031401	TC580890	chr11:87232843-87232902	rn|11q23	8.10607	7.10218	7.10218	9.18072	27.9392	10.3266	6.7228	3.18855	4.30659	3.019	2.82826	2.82826	3.19861	4.80422	3.3683	2.74906	1.6729	2.10655
A_64_P137887	5.63646	16.9726	5.88515	-1.59035	-1.52806	0.0464632	Cdk20	cyclin-dependent kinase 20	GO:0004674(protein serine/threonine kinase activity)|GO:0004693(cyclin-dependent protein kinase activity)|GO:0005524(ATP binding)|GO:0005634(nucleus)|GO:0005737(cytoplasm)|GO:0005929(cilium)|GO:0007275(multicellular organismal development)|GO:0051301(cell division)	Rattus norvegicus cyclin-dependent kinase 20 (Cdk20), mRNA [NM_001025752]		NM_001025752	NM_001025752	NM_001025752	Rn.7013	364666	ENSRNOT00000024466	TC575164	chr17:6221315-6221256	rn|17p14	6.7228	5.09329	5.09329	8.51168	25.9859	16.4202	8.46859	3.18855	5.9983	2.74906	2.3486	2.3486	3.08944	4.69966	4.0374	3.08212	1.6729	2.58455
A_64_P115631	10.4199	25.3598	6.80986	-1.28319	-1.89684	0.0465423	Lime1	Lck interacting transmembrane adaptor 1	GO:0003700(sequence-specific DNA binding transcription factor activity)|GO:0005634(nucleus)|GO:0006357(regulation of transcription from RNA polymerase II promoter)|GO:0007175(negative regulation of epidermal growth factor-activated receptor activity)|GO:0008270(zinc ion binding)|GO:0014066(regulation of phosphatidylinositol 3-kinase cascade)|GO:0019815(B cell receptor complex)|GO:0019901(protein …	Rattus norvegicus Lck interacting transmembrane adaptor 1 (Lime1), mRNA [NM_001108614]		NM_001108614	NM_001108614	NM_001108614	Rn.28151	362289	ENSRNOT00000019545	TC601210	chr3:170524684-170524743	rn|3q43	11.1115	10.0742	10.0742	25.1342	29.4739	21.4712	15.3957	3.18855	1.84536	3.47399	3.33259	3.33259	4.65158	4.88136	4.42433	3.94445	1.6729	0.883901
A_64_P040489	9.33665	19.2416	6.42681	-1.04325	-1.58205	0.0467893	Tas1r2	taste receptor, type 1, member 2		Rattus norvegicus taste receptor, type 1, member 2 (Tas1r2), mRNA [NM_001271266]		NM_001271266	NM_001271266	NM_001271266	Rn.222086	100270683	ENSRNOT00000025173	NP065632	chr5:158473476-158473535	rn|5q36	10.6519	8.67903	8.67903	22.4824	24.5547	10.6876	6.03855	3.18855	10.0533	3.41304	3.11753	3.11753	4.49073	4.61793	3.41787	2.5942	1.6729	3.3296
A_43_P11558	4.01379	23.8014	6.85679	-2.56801	-1.79544	0.0471029	Apod	apolipoprotein D	GO:0000302(response to reactive oxygen species)|GO:0003674(molecular_function)|GO:0005215(transporter activity)|GO:0005615(extracellular space)|GO:0005622(intracellular)|GO:0005737(cytoplasm)|GO:0005783(endoplasmic reticulum)|GO:0006006(glucose metabolic process)|GO:0006629(lipid metabolic process)|GO:0007420(brain development)|GO:0007568(aging)|GO:0010642(negative regulation of platelet-derived …	Rattus norvegicus apolipoprotein D (Apod), mRNA [NM_012777]		NM_012777	NM_012777	NM_012777	Rn.11339	25239	ENSRNOT00000073330	TC599923	chr11_random:890897-890956		7.58236	2.2295	2.2295	8.51168	36.1375	26.7549	9.05929	3.18855	8.32253	2.92265	1.15672	1.15672	3.08944	5.17542	4.74173	3.1794	1.6729	3.05702
A_64_P162262	2.79157	9.27626	3.46407	-1.73247	-1.42108	0.0472096	Cklf	chemokine-like factor	GO:0005125(cytokine activity)|GO:0005576(extracellular region)|GO:0005615(extracellular space)|GO:0008009(chemokine activity)|GO:0008283(cell proliferation)|GO:0016021(integral to membrane)|GO:0030593(neutrophil chemotaxis)|GO:0030595(leukocyte chemotaxis)|GO:0032940(secretion by cell)|GO:0048246(macrophage chemotaxis)|GO:0048247(lymphocyte chemotaxis)	Rattus norvegicus chemokine-like factor (Cklf), mRNA [NM_139111]		NM_139111	NM_139111	NM_139111	Rn.81197	245978	ENSRNOT00000017129	TC624709	chr19:655985-655926	rn|19p14	1.65274	3.36098	3.36098	4.48789	15.0289	8.31197	4.5083	3.18855	2.69535	0.72486	1.74888	1.74888	2.16604	3.90967	3.05519	2.17258	1.6729	1.43047
A_64_P075969	9.76226	19.644	6.65989	-1.0088	-1.56052	0.0472667	Cox18	cytochrome c oxidase assembly homolog 18 (yeast)	GO:0005739(mitochondrion)|GO:0008535(respiratory chain complex IV assembly)|GO:0008565(protein transporter activity)|GO:0015031(protein transport)|GO:0031305(integral to mitochondrial inner membrane)|GO:0051204(protein insertion into mitochondrial membrane)	Rattus norvegicus cytochrome c oxidase assembly homolog 18 (yeast) (Cox18), nuclear gene encoding mitochondrial protein, mRNA [NM_001106000]		NM_001106000	NM_001106000	NM_001106000	Rn.24568	289522	ENSRNOT00000004074	TC595536	chr14:19401586-19401645	rn|14p22	8.10607	10.5904	10.5904	11.122	24.5547	23.2552	8.46859	3.18855	8.32253	3.019	3.40468	3.40468	3.47535	4.61793	4.53948	3.08212	1.6729	3.05702
A_44_P1046713	6.67946	29.3701	7.62172	-2.13654	-1.94616	0.0476671	Cog4	component of oligomeric golgi complex 4	GO:0006890(retrograde vesicle-mediated transport, Golgi to ER)|GO:0007030(Golgi organization)|GO:0017119(Golgi transport complex)|GO:0048213(Golgi vesicle prefusion complex stabilization)	Rattus norvegicus component of oligomeric golgi complex 4 (Cog4), mRNA [NM_001108449]		NM_001108449	NM_001108449	NM_001108449	Rn.107745	361407	ENSRNOT00000023927	TC622990	chr19:40803318-40803377	rn|19q12	8.10607	5.96616	5.96616	44.4896	10.8867	32.734	9.62328	3.18855	10.0533	3.019	2.5768	2.5768	5.4754	3.44449	5.03272	3.26653	1.6729	3.3296
A_44_P552452	2.95993	11.979	2.57139	-2.01688	-2.21989	0.0482853	RT1-Bb	RT1 class II, locus Bb	GO:0002344(B cell affinity maturation)|GO:0002381(immunoglobulin production involved in immunoglobulin mediated immune response)|GO:0002455(humoral immune response mediated by circulating immunoglobulin)|GO:0002579(positive regulation of antigen processing and presentation)|GO:0002827(positive regulation of T-helper 1 type immune response)|GO:0005622(intracellular)|GO:0005769(early endosome)|GO:0…	Rattus norvegicus RT1 class II, locus Bb (RT1-Bb), mRNA [NM_001004084]	04145:Phagosome|04514:Cell adhesion molecules (CAMs)|04612:Antigen processing and presentation|04672:Intestinal immune network for IgA production|04940:Type I diabetes mellitus|05140:Leishmaniasis|05145:Toxoplasmosis|05150:Staphylococcus aureus infection|05310:Asthma|05320:Autoimmune thyroid disease|05322:Systemic lupus erythematosus|05323:Rheumatoid arthritis|05330:Allograft rejection|05332:Graf…	NM_001004084	NM_001004084	NM_001004084	Rn.202964	309622	ENSRNOT00000000525		chr20:4730583-4730533	rn|20p12	4.42078	2.2295	2.2295	4.48789	15.0289	16.4202	1.00696	3.18855	3.51865	2.1443	1.15672	1.15672	2.16604	3.90967	4.0374	0.01	1.6729	1.81502
A_64_P043936	1.4655	22.1915	6.02375	-3.92054	-1.88127	0.0486534	Sorcs1	sortilin-related VPS10 domain containing receptor 1	GO:0003674(molecular_function)|GO:0005575(cellular_component)|GO:0008150(biological_process)|GO:0016020(membrane)|GO:0016021(integral to membrane)	PREDICTED: Rattus norvegicus sortilin-related VPS10 domain containing receptor 1, transcript variant 1 (Sorcs1), mRNA [XM_001070775]		XM_001070775	XM_001070775	XM_001070775		309533			chr1:255766894-255766835	rn|1q55	2.38259	1.00696	1.00696	3.38574	41.7174	21.4712	3.51358	3.18855	11.3691	1.25253	0.01	0.01	1.75947	5.38258	4.42433	1.81294	1.6729	3.50705
A_44_P279229	2.19375	4.94377	1.75459	-1.17221	-1.49448	0.0489201	Erh	enhancer of rudimentary homolog (Drosophila)	GO:0007049(cell cycle)|GO:0030496(midbody)	Rattus norvegicus enhancer of rudimentary homolog (Drosophila) (Erh), mRNA [NM_001109442]		NM_001109442	NM_001109442	NM_001109442	Rn.7881	681415	ENSRNOT00000066014	TC636514	chr6:104396659-104396600	rn|6q24	3.52374	1.52875	1.52875	4.48789	5.09329	5.25013	1.00696	3.18855	1.06825	1.81711	0.612357	0.612357	2.16604	2.3486	2.39235	0.01	1.6729	0.095251
A_64_P129498	102.433	230.886	113.85	-1.1725	-1.02004	0.0492164	Cit	citron (rho-interacting, serine/threonine kinase 21)	GO:0000070(mitotic sister chromatid segregation)|GO:0000086(G2/M transition of mitotic cell cycle)|GO:0000910(cytokinesis)|GO:0001726(ruffle)|GO:0004674(protein serine/threonine kinase activity)|GO:0005083(small GTPase regulator activity)|GO:0005543(phospholipid binding)|GO:0005737(cytoplasm)|GO:0005773(vacuole)|GO:0005886(plasma membrane)|GO:0006468(protein phosphorylation)|GO:0007030(Golgi orga…	Rattus norvegicus citron (rho-interacting, serine/threonine kinase 21) (Cit), mRNA [NM_001029911]		NM_001029911	NM_001029911	NM_001029911	Rn.89069	83620	ENSRNOT00000057036	TC578902	chr12:41954938-41954879	rn|12q16	105.71	100.795	100.795	131.111	340.892	220.656	145.013	92.0592	104.479	6.72396	6.65528	6.65528	7.03465	8.41317	7.78565	7.18004	6.52449	6.70707
